# Supplementary material for: Total synthesis of (−)-aplaminal by Buchwald–Hartwig cross-coupling of an aminal
Source: Royal Society of Chemistry journal article supplement (doi:10.1039/c9nj04743c), 2019-01-01

***Electronic Supplementary Information***

Total Synthesis of (–)-Aplaminal by Buchwald–Hartwig Cross-Coupling of an Aminoalcohol

Takayuki Ohyoshi,\* Kei Akemoto, Ayaka Taniguchi, Takuma Ishihara, Hideo Kigoshi\*

*Department of Chemistry, Graduate School of Pure and Applied Sciences, University of Tsukuba, 1-1-1*

*Tennodai, Tsukuba 305-8571, Japan*

## Experimental Procedures and Spectral Data for All New Compounds.

### General methods.

All moisture-sensitive reactions were performed under an atmosphere of argon or nitrogen, and the starting materials were azeotropically dried with benzene before use. Anhydrous benzene, CH<sub>2</sub>Cl<sub>2</sub>, MeOH, MeCN, DMF, THF, and toluene were used as obtained from commercial supplies. TLC analyses were conducted on E. Merck precoated silica gel 60 F<sub>254</sub> (0.25 mm layer thickness). Fuji Silysia silica gel BW-820MH (75–200 μm) and FL-60D (45–75 μm) were used for column chromatography. Optical rotations were measured with a JASCO DIP-370 polarimeter. Infrared (IR) spectra were recorded on a JASCO FT/IR-4100 instrument, and only selected peaks are reported in wavenumbers (cm<sup>-1</sup>). <sup>1</sup>H and <sup>13</sup>C NMR spectra were recorded on a Bruker AVANCE 600, a Bruker AVANCE 400, or a Bruker DPX 400 spectrometer. The <sup>1</sup>H and <sup>13</sup>C chemical shifts (δ) were referenced with CDCl<sub>3</sub> (δ<sub>H</sub> = 7.26 (CHCl<sub>3</sub>) and δ<sub>C</sub> = 77.0), acetone-*d*<sub>6</sub> (δ<sub>H</sub> = 2.05 (CHD<sub>2</sub>COCD<sub>3</sub>) and δ<sub>C</sub> = 29.8), DMSO-*d*<sub>6</sub> (δ<sub>H</sub> = 2.50 (CHD<sub>2</sub>SOCD<sub>3</sub>) and δ<sub>C</sub> = 39.5), or CD<sub>3</sub>OD (δ<sub>H</sub> = 3.31 (CHD<sub>2</sub>OD) and δ<sub>C</sub> = 49.0). *J* values are given in Hz. The following abbreviations are used for spin multiplicity: s = singlet, d = doublet, t = triplet, q = quartet, m = multiplet, and br = broad. High resolution ESI/TOF mass spectra were recorded on a JEOL AccuTOFCS JMS-T100CS spectrometer. All new compounds were determined to be >95% pure by <sup>1</sup>H NMR unless otherwise noted.

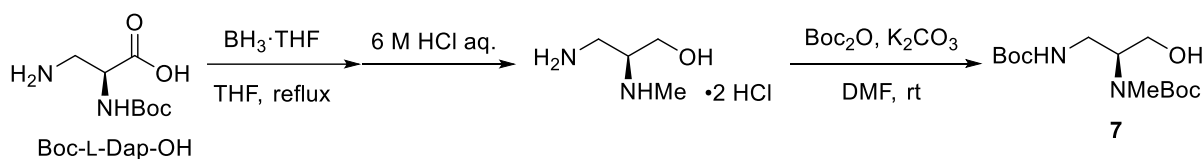

### Alcohol 7.

To a stirred solution of Boc-L-Dap-OH (1.04 g, 5.10 mmol) in THF (25 mL) was added BH<sub>3</sub>·THF (1.0 M solution in THF, 25.0 mL, 25.0 mmol) at 0 °C. The mixture was stirred at reflux for 24 h, diluted with 6 M HCl aq. (15 mL), and concentrated. The crude diamine hydrochloride was used for the next reaction without further purification.

To a stirred solution of crude diamine hydrochloride in DMF (13 mL) were added K<sub>2</sub>CO<sub>3</sub> (2.72 g, 20.4 mmol) and Boc<sub>2</sub>O (3.56 mL, 15.5 mmol) at room temperature. The mixture was stirred at the same temperature for 19 h and filtered through a pad of Celite<sup>®</sup>, which was rinsed with CHCl<sub>3</sub> (150 mL). The filtrate and a rinse were combined and concentrated. The residual oil was purified by column chromatography on silica gel (100 g, hexane–AcOEt 3:1 → 2:1 → 1:1 → 0:1) to give alcohol 7 (1.36 g, 88%) as a white solid: Mp 112.9–115.5 °C; [α]<sup>19</sup><sub>D</sub> –8.25 (*c* 1.33, CHCl<sub>3</sub>); IR (CHCl<sub>3</sub>) 3453, 2980, 2933, 1683, 1509, 1393, 1268, 1250, 1159 cm<sup>-1</sup>; <sup>1</sup>H NMR (400 MHz, CDCl<sub>3</sub>) δ 8.01 (s, 1H), 4.84 (br, 1H), 3.93 (m, 1H), 3.73–3.68 (m, 2H), 3.41 (m, 1H), 3.24 (m, 1H), 2.86 (s, 3H), 1.46 (s, 9H), 1.44 (s, 9H); <sup>13</sup>C NMR (100 MHz, CDCl<sub>3</sub>) δ 156.8, 156.4, 79.9, 79.4, 61.3, 57.4, 38.8, 31.3, 28.3 (3C), 28.2 (3C); HRMS (ESI) *m/z* 327.1924, calcd for C<sub>14</sub>H<sub>28</sub>N<sub>2</sub>NaO<sub>5</sub> [M+Na]<sup>+</sup> 327.1896.

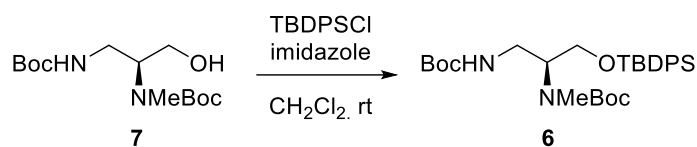

### TBDPS ether **6**.

To a stirred solution of alcohol **7** (100 mg, 0.330 mmol) in CH<sub>2</sub>Cl<sub>2</sub> (3.2 mL) were added imidazole (44.9 mg, 0.660 mmol) and TBDPSCl (0.11 mL, 0.43 mmol) at room temperature. The mixture was stirred at the same temperature for 30 min, diluted with brine (10 mL), and extracted with CHCl<sub>3</sub> (3×10 mL). The combined extracts were washed with brine (10 mL), dried (Na<sub>2</sub>SO<sub>4</sub>), and concentrated. The residual oil was purified by column chromatography on silica gel (5.4 g, hexane–AcOEt 10:1 → 5:1) to give TBDPS ether **6** (175 mg, 98%) as a colorless solid; Mp 74.8–76.9°C; [α]<sup>19</sup><sub>D</sub> –2.60 (*c* 1.03, CHCl<sub>3</sub>); IR (CHCl<sub>3</sub>) 3447, 3009, 2979, 2860, 1707, 1685, 1508, 1252, 1114, 998, 704 cm<sup>-1</sup>; <sup>1</sup>H NMR (400 MHz, CDCl<sub>3</sub>) δ 7.64–7.62 (m, 4H), 7.45–7.36 (m, 6H), 4.59 [4.71] (m, 1H), 4.29 [4.14] (m, 1H), 3.72–3.62 (m, 2H), 3.31 (m, 1H), 3.20 (m, 1H), 2.79 [2.76] (s, 3H), 1.46 [1.43] (s, 9H), 1.42 (s, 9H), 1.04 (s, 9H) (The rotamer's signals in the ratio of 1:0.9 are in brackets); <sup>13</sup>C NMR (100 MHz, CDCl<sub>3</sub>) δ 156.5 [155.8], 155.9, 135.5 (4C), 133.1 (2C), 129.7 (2C), 127.7 (4C), 79.9 [79.5], 79.3 [79.1], 63.1 [63.0], 57.5 [56.3], 39.5, 30.2 [29.6], 28.4 (3C), 28.3 (3C), 26.7 (3C), 19.3 (The rotamer's signals in the ratio of 1:0.9 are in brackets); HRMS (ESI) *m/z* 565.3068, calcd for C<sub>30</sub>H<sub>46</sub>N<sub>2</sub>NaO<sub>5</sub>Si [M+Na]<sup>+</sup> 565.3074.

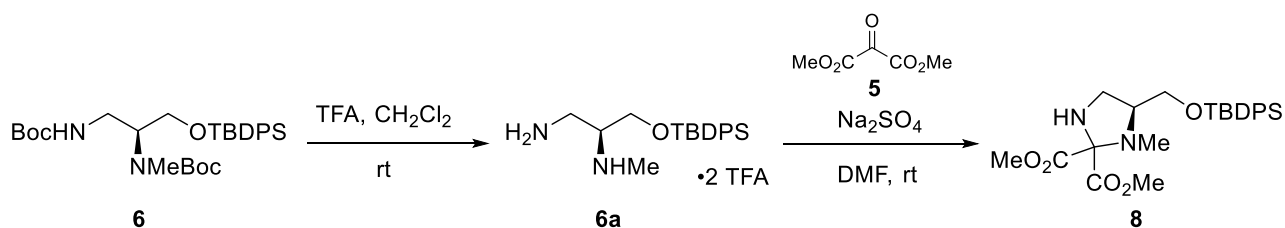

### Aminal **8**.

To a stirred solution of TBDPS ether **6** (1.31 g, 2.42 mmol) in CH<sub>2</sub>Cl<sub>2</sub> (32 mL) was added TFA (7.0 mL, 91.5 mmol) at 0 °C. After being stirred at same temperature for 3 h, the reaction mixture was concentrated. The crude diamine TFA salt **6a** was used for the next reaction without further purification.

To a stirred solution of crude diamine TFA salt **6a** in DMF (17 mL) were added Na<sub>2</sub>SO<sub>4</sub> (7.73 g, 5.12 mmol) and dimethyl 2-oxomalonate (**5**) (0.37 mL, 3.21 mmol) at room temperature. The mixture was stirred at the same temperature for 2 d, diluted with saturated aqueous NaHCO<sub>3</sub> (15 mL), filtered, and extracted with AcOEt (2×30 mL). The combined extracts were washed with brine (30 mL), dried (Na<sub>2</sub>SO<sub>4</sub>), and concentrated. The residual oil was purified by column chromatography on silica gel (70 g, hexane–acetone 6:1) to give aminal **8** (970 mg, 85%) as a colorless oil; [α]<sup>24</sup><sub>D</sub> –0.80 (*c* 2.5, CHCl<sub>3</sub>); IR (CHCl<sub>3</sub>) 2955, 2858, 1736, 1472, 1227, 824, 788 cm<sup>-1</sup>; <sup>1</sup>H NMR (400 MHz, CDCl<sub>3</sub>) δ 7.65 (d, *J* = 6.6 Hz, 4H), 7.45–7.36 (m, 6H), 3.78 (s, 3H), 3.77 (s, 3H), 3.67 (dd, *J* = 10.3, 4.3 Hz, 1H), 3.53 (dd, *J* = 10.3, 5.7 Hz, 1H), 3.31 (dd, *J* = 10.1, 7.7 Hz, 1H), 3.24–3.19 (m, 2H), 3.09 (dd, *J* = 10.1, 4.8 Hz, 1H), 2.56 (s, 3H), 1.07 (s, 9H); <sup>13</sup>C NMR (100 MHz, CDCl<sub>3</sub>) δ 169.7, 169.4, 135.6 (4C), 133.5 (2C), 129.7 (2C), 127.7 (4C), 85.4, 65.9, 65.3, 52.8, 52.2, 47.8, 35.1, 26.8 (3C), 19.2; HRMS (ESI) *m/z* 493.2135, calcd for C<sub>25</sub>H<sub>34</sub>N<sub>2</sub>NaO<sub>5</sub>Si [M+Na]<sup>+</sup> 493.2142.

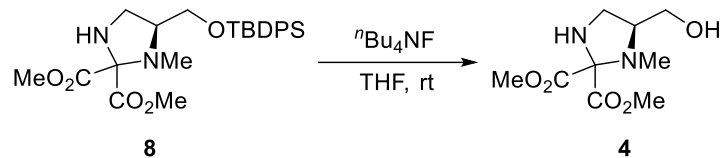

#### Alcohol 4.

To a stirred solution of aminal **8** (4.25 g, 9.12 mmol) in THF (150 mL) was added TBAF (1.0 M solution in THF, 12.5 mL, 12.5 mmol) at 0 °C. The mixture was stirred at room temperature for 1.5 h, diluted with AcOH (1.0 M solution in THF, 12.5 mL, 12.5 mmol), and concentrated. The residual oil was purified by column chromatography on silica gel (250 g, hexane–acetone 3:1→2:1→1:1) to give alcohol **4** (1.82 g, 86%) as a yellow oil:  $[\alpha]_D^{24} +0.06$  (*c* 2.7, CHCl<sub>3</sub>); IR (CHCl<sub>3</sub>) 3347, 2956, 2882, 1736, 1437 cm<sup>-1</sup>; <sup>1</sup>H NMR (400 MHz, CDCl<sub>3</sub>) δ 3.83 (s, 3H), 3.78 (s, 3H), 3.70 (dd, *J* = 11.4, 2.8 Hz, 1H), 3.46 (d, *J* = 11.4 Hz, 1H), 3.26–3.11 (m, 3H), 2.59 (s, 3H), Signals due to two protons (NH, OH) were not observed; <sup>13</sup>C NMR (100 MHz, CDCl<sub>3</sub>) δ 169.5, 169.4, 85.2, 65.2, 60.2, 53.0, 52.3, 46.9, 34.1; HRMS (ESI) *m/z* 255.0957, calcd for C<sub>9</sub>H<sub>16</sub>N<sub>2</sub>NaO<sub>5</sub> [M+Na]<sup>+</sup> 255.0957.

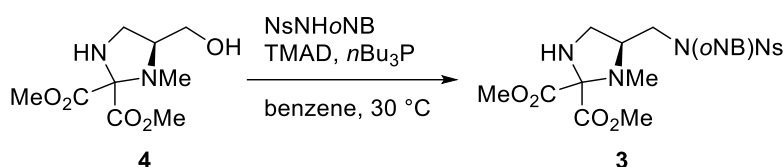

#### Nosylamide 3.

To a stirred solution of alcohol **4** (43.0 mg, 185 μmol) in benzene (0.6 mL) were added NsNH<sub>o</sub>NB (105 mg, 311 μmol), *n*Bu<sub>3</sub>P (75 μL, 311 μmol), and TMAD (52.8 mg, 311 μmol) at 0 °C. The mixture was stirred at 30 °C for 24 h and concentrated. The residual oil was purified by column chromatography on silica gel (15 g, toluene–AcOEt 1:0→5:1) to give nosylamide **3** (32.2 mg, 32%) as a yellow oil:  $[\alpha]_D^{24} -2.5$  (*c* 0.69, CHCl<sub>3</sub>); IR (CHCl<sub>3</sub>) 2360, 1735, 1542, 1353, 925, 853, 771 cm<sup>-1</sup>; <sup>1</sup>H NMR (400 MHz, CDCl<sub>3</sub>) δ 7.98 (dd, *J* = 8.1, 1.0 Hz, 1H), 7.94 (dd, *J* = 7.8, 1.1 Hz, 1H), 7.73–7.61 (m, 4H), 7.55 (ddd, *J* = 7.8, 6.9, 1.1 Hz, 1H), 7.41 (ddd, *J* = 8.1, 7.3, 1.0 Hz, 1H), 5.10 (d, *J* = 18.0 Hz, 1H), 5.02 (d, *J* = 18.0 Hz, 1H), 3.80 (s, 3H), 3.70 (s, 3H), 3.44–3.42 (m, 2H), 3.13–3.09 (m, 2H), 2.96–2.93 (m, 2H), 2.45 (s, 3H); <sup>13</sup>C NMR (100 MHz, CDCl<sub>3</sub>) δ 169.2 (2C), 148.3, 148.0, 134.0, 133.6, 132.9, 132.0, 131.9, 130.9, 129.3, 128.6, 84.8, 63.8, 53.0, 52.3, 51.3, 50.0, 48.2, 34.8; HRMS (ESI) *m/z* 574.1220, calcd for C<sub>22</sub>H<sub>25</sub>N<sub>5</sub>NaO<sub>10</sub>S [M+Na]<sup>+</sup> 574.1220.

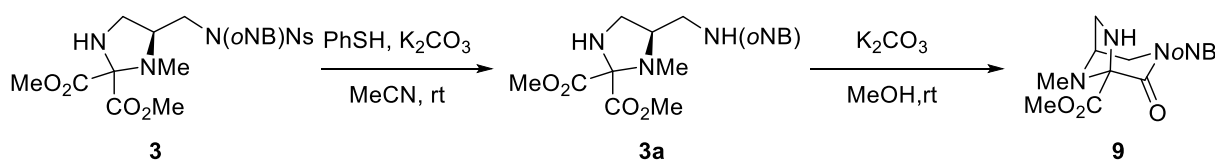

#### Lactam 9.

To a stirred solution of nosylamide **3** (1.01 g, 1.83 mmol) in MeCN (10 mL) were added K<sub>2</sub>CO<sub>3</sub> (2.54 g, 18.3

mmol) and PhSH (0.93 mL, 9.15 mmol) at 0 °C. The mixture was stirred at room temperature for 3.5 h, filtered, and concentrated. The residual oil was purified by column chromatography on silica gel (45 g, CHCl<sub>3</sub>–MeOH 1:0 → 30:1) to give amine **3a** (contaminated with unidentified impurities).

To a stirred solution of amine **3a** in MeOH (20 mL) was added K<sub>2</sub>CO<sub>3</sub> (1.26 g, 9.16 mmol) at room temperature. The mixture was stirred at the same temperature for 15 h, diluted with H<sub>2</sub>O (10 mL), and extracted with CHCl<sub>3</sub> (7×15 mL). The combined extracts were washed with brine (20 mL), dried (Na<sub>2</sub>SO<sub>4</sub>), and concentrated. The residual oil was purified by column chromatography on silica gel (45 g, CHCl<sub>3</sub>–MeOH 1:0 → 20:1) to give lactam **9** (592 mg, 97% in 2 steps) as a yellow solid. [ $\alpha$ ]<sup>24</sup><sub>D</sub> +0.18 (*c* 0.48, CHCl<sub>3</sub>); IR (CHCl<sub>3</sub>) 3014, 2400, 1752, 1672, 1494, 1440, 1125, 669 cm<sup>-1</sup>; <sup>1</sup>H NMR (400 MHz, CDCl<sub>3</sub>)  $\delta$  7.99 (dd, *J* = 7.9, 1.0 Hz, 1H), 7.63 (ddd, *J* = 7.8, 7.8, 1.0 Hz, 1H), 7.44–7.40 (m, 2H), 5.06 (d, *J* = 16.7 Hz, 1H), 4.63 (d, *J* = 16.7 Hz, 1H), 3.91 (s, 3H), 3.65 (m, 1H), 3.55–3.49 (m, 2H), 2.92 (d, *J* = 11.0 Hz, 1H), 2.89 (d, *J* = 9.6 Hz, 1H), 2.31 (s, 3H), A signal due to one proton (NH) was not observed; <sup>13</sup>C NMR (100 MHz, CDCl<sub>3</sub>)  $\delta$  167.0, 166.6, 148.7, 134.0, 132.1, 128.7, 128.2, 125.0, 87.0, 60.9, 53.2, 53.0, 46.5, 45.9, 37.0; HRMS (ESI) *m/z* 357.1175, calcd for C<sub>15</sub>H<sub>18</sub>N<sub>4</sub>NaO<sub>5</sub> [M+Na]<sup>+</sup> 357.1157.

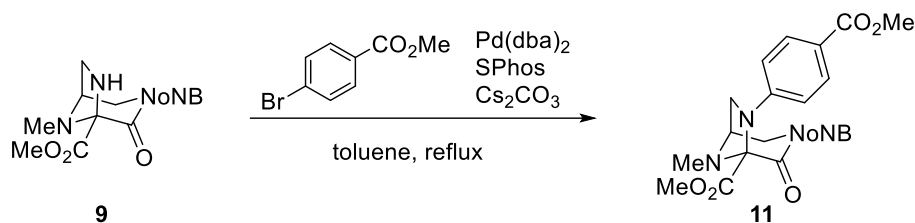

### Coupling compound **11**.

To the mixture of lactam **9** (14.4 mg, 45  $\mu$ mol), methyl 4-bromobenzoate (28.9 mg, 135  $\mu$ mol), Pd(dba)<sub>2</sub> (25.8 mg, 45  $\mu$ mol), SPhos (18.4 mg, 45  $\mu$ mol), and Cs<sub>2</sub>CO<sub>3</sub> (87.6 mg, 269  $\mu$ mol) was added degassed toluene (0.5 mL). The mixture was stirred at reflux for 24 h, filtered through a pad of Celite<sup>®</sup>, and concentrated. The residual oil was purified by column chromatography on silica gel (5 g, hexane–acetone 5:1 → 1:1) to give coupling compound **11** (16.6 mg, 82%) as a yellow solid; [ $\alpha$ ]<sup>24</sup><sub>D</sub> -13.7 (*c* 0.78, CHCl<sub>3</sub>); IR (CHCl<sub>3</sub>) 3019, 1759, 1704, 1675, 1606, 1527, 1287, 1192, 910, 842 cm<sup>-1</sup>; <sup>1</sup>H NMR (400 MHz, CDCl<sub>3</sub>)  $\delta$  7.93–7.90 (m, 3H), 7.30 (ddd, *J* = 7.6, 7.6, 1.2 Hz, 1H), 7.12 (ddd, *J* = 7.6, 7.6, 1.2 Hz, 1H), 6.89–6.84 (m, 3H), 5.12 (d, *J* = 16.6 Hz, 1H), 4.46 (d, *J* = 16.6 Hz, 1H), 4.54 (ddd, *J* = 9.2, 5.6, 1.7 Hz, 1H), 3.94 (s, 3H), 3.92 (s, 3H), 3.76 (ddd, *J* = 11.3, 4.5, 1.7 Hz, 1H), 3.67 (m, 1H), 3.29 (d, *J* = 9.2 Hz, 1H), 3.06 (d, *J* = 11.3 Hz, 1H), 2.56 (s, 3H); <sup>13</sup>C NMR (100 MHz, CDCl<sub>3</sub>)  $\delta$  167.2, 165.2, 163.8, 148.7, 148.6, 133.7, 131.5, 130.5 (2C), 128.4, 128.3, 124.9, 120.1, 115.3 (2C), 86.1, 58.6, 53.2, 53.1, 52.8, 51.7, 45.9, 38.4; HRMS (ESI) *m/z* 491.1543, calcd for C<sub>23</sub>H<sub>24</sub>N<sub>4</sub>NaO<sub>7</sub> [M+Na]<sup>+</sup> 491.1577.

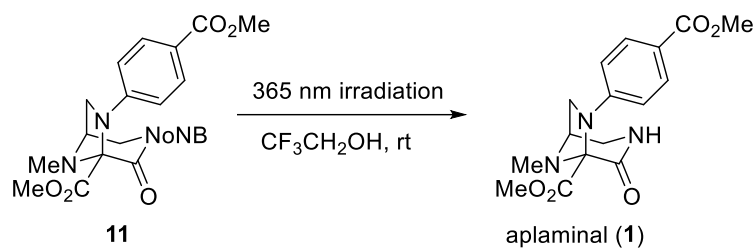

### Aplaminal (1).

The solution of coupling compound **11** (16.6 mg, 35  $\mu\text{mol}$ ) in trifluoroethanol (12 mL) was stirred at room temperature for 24 h under 365 irradiation and concentrated. The residual oil was purified by column chromatography on silica gel (3 g,  $\text{CHCl}_3$ –MeOH 1:0  $\rightarrow$  50:1) to give aplaminal (**1**) (8.6 mg, 73%) as a white solid; Mp 232–234  $^\circ\text{C}$ ;  $[\alpha]_{\text{D}}^{24} -107$  (*c* 0.22, MeOH); IR (MeOH) 3407, 1747, 1654, 1605, 1284, 1192, 826, 789  $\text{cm}^{-1}$ ;  $^1\text{H}$  NMR (600 MHz, acetone- $d_6$ )  $\delta$  7.77 (d,  $J = 8.9$  Hz, 2H), 6.86 (d,  $J = 8.9$  Hz, 2H), 6.61 (brs, 1H), 4.27 (ddd,  $J = 9.2, 5.8, 1.5$  Hz, 1H), 3.85–3.75 (m, 1H), 3.80 (s, 3H), 3.79 (s, 3H), 3.68 (dd,  $J = 11.5, 4.3$  Hz, 1H), 3.37 (d,  $J = 9.2$  Hz, 1H), 3.24 (m, 1H), 2.47 (s, 3H);  $^{13}\text{C}$  NMR (151 MHz, acetone- $d_6$ )  $\delta$  167.3, 166.3, 164.8, 150.7, 130.5 (2C), 119.8, 116.2 (2C), 86.9, 58.8, 53.5, 52.7, 51.6, 47.4, 38.2; HRMS (ESI)  $m/z$  356.1222, calcd for  $\text{C}_{16}\text{H}_{19}\text{N}_3\text{NaO}_5$   $[\text{M}+\text{Na}]^+$  356.1222.

### Comparison of the $^1\text{H}$ data of synthetic aplaminal and natural sample

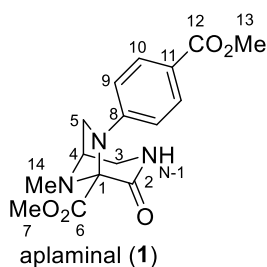

| $^1\text{H}$ in acetone- $d_6$ | natural, $\delta$ (ppm)            | synthetic, $\delta$ (ppm)          |
|--------------------------------|------------------------------------|------------------------------------|
| 3a                             | 3.66 (m)                           | 3.68 (dd, $J = 11.5, 4.3$ Hz)      |
| 3b                             | 3.23 (m)                           | 3.24 (m)                           |
| 4                              | 3.85–3.75 (m)                      | 3.85–3.75 (m)                      |
| 5a                             | 4.26 (ddd, $J = 9.2, 5.7, 1.4$ Hz) | 4.27 (ddd, $J = 9.2, 5.8, 1.5$ Hz) |
| 5b                             | 3.36 (d, $J = 9.2$ Hz)             | 3.37 (d, $J = 9.2$ Hz)             |
| 7                              | 3.79 (s, 3H)                       | 3.80 (s)                           |
| 9                              | 6.85 (d, $J = 9.1$ Hz, 2H)         | 6.86 (d, $J = 8.9$ Hz, 2H)         |
| 10                             | 7.76 (d, $J = 9.1$ Hz, 2H)         | 7.77 (d, $J = 8.9$ Hz, 2H)         |
| 13                             | 3.78 (s)                           | 3.79 (s)                           |
| 14                             | 2.46 (s)                           | 2.47 (s)                           |
| N-1                            | 6.62 (brs)                         | 6.61 (brs)                         |

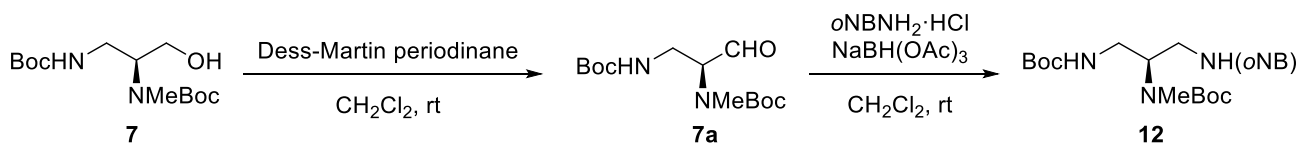

### Amine 12.

To a stirred solution of alcohol **7** (41.7 mg, 137  $\mu\text{mol}$ ) in  $\text{CH}_2\text{Cl}_2$  (1.9 mL) was added Dess–Martin periodinane (116 mg, 274  $\mu\text{mol}$ ) at 0 °C. After being stirred at room temperature for 2 h, the mixture was diluted with saturated aqueous  $\text{NaHCO}_3$  (1.0 mL), saturated aqueous  $\text{Na}_2\text{S}_2\text{O}_3$  (1.0 mL), and  $\text{H}_2\text{O}$  (1.0 mL). The mixture was extracted with  $\text{Et}_2\text{O}$  (3 $\times$ 3 mL). The combined extracts were washed with brine (10 mL), dried ( $\text{Na}_2\text{SO}_4$ ), and concentrated. The crude aldehyde **7a** was used for the next reaction without further purification.

To a stirred solution of crude aldehyde **7a** in  $\text{CH}_2\text{Cl}_2$  (1.5 mL) was added  $o\text{NBNH}_2\cdot\text{HCl}$  (51.7 mg, 274  $\mu\text{mol}$ ) at room temperature. After the mixture was stirred at same temperature for 1 h,  $\text{NaBH}(\text{OAc})_3$  (87.1 mg, 411  $\mu\text{mol}$ ) was added to the mixture. The mixture was stirred at same temperature for 12 h and diluted with saturated aqueous  $\text{NaHCO}_3$  (2.0 mL). The mixture was extracted with  $\text{CH}_2\text{Cl}_2$  (3 $\times$ 3 mL). The combined extracts were washed with brine (10 mL), dried ( $\text{Na}_2\text{SO}_4$ ), and concentrated. The residual oil was purified by column chromatography on silica gel (20 g, hexane–acetone 10:1  $\rightarrow$  5:1) to give amine **12** (54.1 mg, 90% in 2 steps) as a colorless oil;  $[\alpha]_D^{23} +4.3$  ( $c$  1.89,  $\text{CHCl}_3$ ); IR ( $\text{CHCl}_3$ ) 3445, 3017, 1684, 1525, 1367, 1225, 1160, 798, 787  $\text{cm}^{-1}$ ;  $^1\text{H}$  NMR (400 MHz,  $\text{DMSO}-d_6$ )  $\delta$  7.90 (d,  $J$  = 8.1 Hz, 1H), 7.71–7.64 (m, 2H), 7.49 (dd,  $J$  = 8.1, 7.8 Hz, 1H), 6.34 (brs, 1H), 4.09 (m, 1H), 3.96 (s, 2H), 3.12–2.94 (m, 2H), 2.64 (s, 3H), 2.71–2.50 (m, 2H), 1.40 (s, 9H), 1.39 (s, 9H);  $^{13}\text{C}$  NMR (100 MHz,  $\text{DMSO}-d_6$ )  $\delta$  155.1 (2C), 148.7, 135.1, 132.4, 130.2, 127.5, 123.6, 78.7, 77.9, 77.2, 59.8, 48.7, 47.9, 38.9, 27.9 (3C), 27.7 (3C); HRMS (ESI)  $m/z$  461.2393, calcd for  $\text{C}_{21}\text{H}_{34}\text{N}_4\text{NaO}_6$   $[\text{M}+\text{Na}]^+$  461.2376.

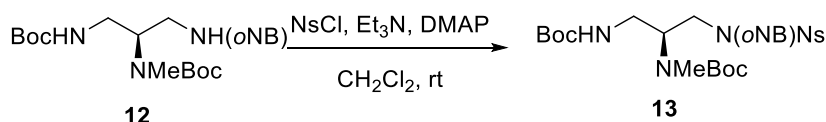

### Nosylamide 13.

To a stirred solution of amine **12** (54.1 mg, 123  $\mu\text{mol}$ ) in  $\text{CH}_2\text{Cl}_2$  (1.0 mL) were added  $\text{Et}_3\text{N}$  (34  $\mu\text{L}$ , 246  $\mu\text{mol}$ ),  $\text{NsCl}$  (41.0 mg, 185  $\mu\text{mol}$ ), and  $\text{DMAP}$  (7.5 mg, 62  $\mu\text{mol}$ ) at room temperature. The mixture was stirred at the same temperature for 19 h, diluted with saturated aqueous  $\text{NaHCO}_3$  (2.0 mL), and extracted with  $\text{CH}_2\text{Cl}_2$  (3 $\times$ 3 mL). The combined extracts were washed with brine (10 mL), dried ( $\text{Na}_2\text{SO}_4$ ), and concentrated. The residual oil was purified by column chromatography on silica gel (3 g, hexane–acetone 5:1  $\rightarrow$  3:1) to give nosylamide **13** (69.0 mg, 90%) as a yellow solid; Mp 68.0–69.0 °C;  $[\alpha]_D^{23} -3.8$  ( $c$  0.60,  $\text{CHCl}_3$ ); IR ( $\text{CHCl}_3$ ) 3452, 3018, 1709, 1545, 1529, 1368, 1226, 1053, 795  $\text{cm}^{-1}$ ;  $^1\text{H}$  NMR (400 MHz,  $\text{DMSO}-d_6$ )  $\delta$  8.01 (d,  $J$  = 8.0 Hz, 1H), 7.98 (d,  $J$  = 7.9 Hz, 1H), 7.92 (d,  $J$  = 7.9 Hz, 1H), 7.86 (dd,  $J$  = 8.0, 7.6 Hz, 1H), 7.76 (dd,  $J$  = 8.0, 7.6 Hz, 1H), 7.61 (dd,  $J$  = 7.9, 7.7 Hz, 1H), 7.51 (dd,  $J$  = 7.9, 7.7 Hz, 1H), 7.48 (d,  $J$  = 8.0 Hz, 1H), 6.45 (brs, 1H), 4.93 (s, 2H), 4.26–4.03 (m, 2H), 3.67 (dd,  $J$  = 14.2, 9.3 Hz, 1H),

3.40 (d,  $J = 15.4$  Hz, 1H), 3.04 (m, 1H), 2.54 (s, 3H), 1.35 (s, 18H);  $^{13}\text{C}$  NMR (100 MHz,  $\text{DMSO-}d_6$ )  $\delta$  155.8 (2C), 148.4, 147.9, 135.2, 134.0, 132.9, 132.1, 131.6, 130.7, 129.3, 129.1, 125.3, 124.9, 79.6, 79.4, 78.3, 55.2, 48.7, 48.6, 39.8, 28.6 (3C), 28.5(3C); HRMS (ESI)  $m/z$  646.2177, calcd for  $\text{C}_{27}\text{H}_{37}\text{N}_5\text{NaO}_{10}\text{S}$   $[\text{M}+\text{Na}]^+$  646.2159.

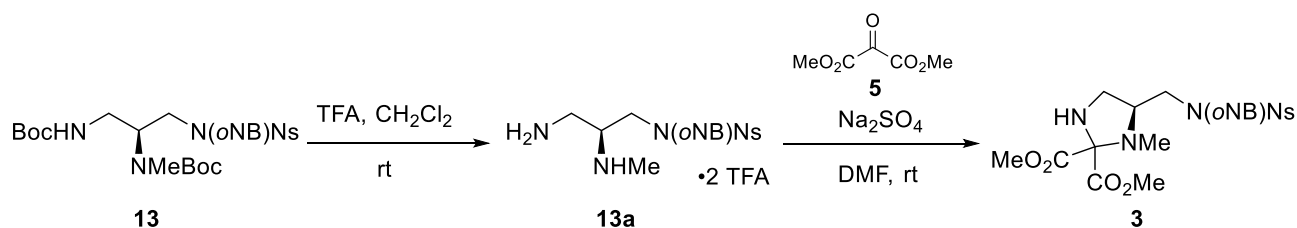

### Aminal **3**.

To a stirred solution of nosylamide **13** (69.0 mg, 110  $\mu\text{mol}$ ) in  $\text{CH}_2\text{Cl}_2$  (2.8 mL) was added TFA (0.8 mL, 821  $\mu\text{mol}$ ) at 0 °C. After being stirred at room temperature for 3 h, the reaction mixture was concentrated. The crude diamine TFA salt **13a** was used for the next reaction without further purification.

To a stirred solution of crude diamine TFA salt **13a** in DMF (0.8 mL) were added  $\text{Na}_2\text{SO}_4$  (312 mg, 2.20 mmol) and dimethyl 2-oxomalonate (**5**) (16  $\mu\text{L}$ , 143  $\mu\text{mol}$ ) at room temperature. The mixture was stirred at the same temperature for 2 d, diluted with saturated aqueous  $\text{NaHCO}_3$  (2.0 mL), filtered, and extracted with  $\text{CHCl}_3$  (3 $\times$ 5 mL). The combined extracts were washed with brine (10 mL), dried ( $\text{Na}_2\text{SO}_4$ ), and concentrated. The residual oil was purified by column chromatography on silica gel (7 g, hexane–acetone 5:1  $\rightarrow$  3:1) to give aminal **3** (61.0 mg, quant. in 2 steps) as a yellow oil.

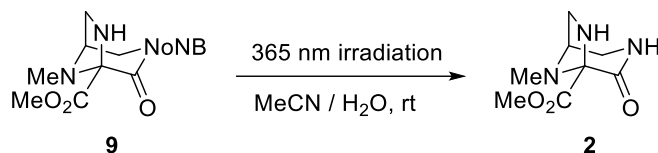

### Bicyclic core **2**.

The solution of lactam **9** (20.1 mg, 60  $\mu\text{mol}$ ) in  $\text{MeCN-H}_2\text{O}$  (4:1) (1.0 mL) was stirred at room temperature for 24 h under 365 irradiation and concentrated. The residual oil was purified by column chromatography on silica gel (3 g,  $\text{CHCl}_3\text{-MeOH}$  1:0  $\rightarrow$  10:1) to give bicyclic core **2** (8.8 mg, 73%) as a white solid; Mp 207.0–208.0 °C;  $[\alpha]_D^{23} +30.4$  ( $c$  0.22,  $\text{CHCl}_3$ ); IR ( $\text{CHCl}_3$ ) 3685, 3410, 3018, 1752, 1690, 1455, 1301, 1120  $\text{cm}^{-1}$ ;  $^1\text{H}$  NMR (400 MHz,  $\text{CD}_3\text{OD}$ )  $\delta$  3.85 (s, 3H), 3.59 (m, 1H), 3.52 (dd,  $J = 11.5, 3.4$  Hz, 1H), 3.45 (dd,  $J = 10.8, 6.4$  Hz, 1H), 3.02 (d,  $J = 11.5$  Hz, 1H), 2.83 (d,  $J = 10.8$  Hz, 1H), 2.26 (s, 3H);  $^{13}\text{C}$  NMR (100 MHz,  $\text{CD}_3\text{OD}$ )  $\delta$  169.4, 168.0, 88.3, 61.3, 53.2, 47.7, 47.0, 36.9; HRMS (ESI)  $m/z$  222.0835, calcd for  $\text{C}_8\text{H}_{13}\text{N}_3\text{NaO}_3$   $[\text{M}+\text{Na}]^+$  222.0855.



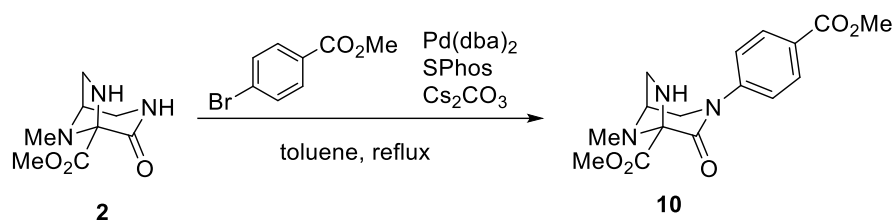

### Aplaminal analog 10.

To the mixture of bicyclic core **2** (8.8 mg, 44  $\mu\text{mol}$ ), methyl 4-bromobenzoate (33.1 mg, 154  $\mu\text{mol}$ ), Pd(dba)<sub>2</sub> (25.4 mg, 44  $\mu\text{mol}$ ), SPhos (18.1 mg, 44  $\mu\text{mol}$ ), and Cs<sub>2</sub>CO<sub>3</sub> (144 mg, 440  $\mu\text{mol}$ ) was added degassed toluene (1.5 mL). The mixture was stirred at reflux for 24 h, filtered through a pad of Celite<sup>®</sup>, and concentrated. The residual oil was purified by column chromatography on silica gel (2.5 g, CHCl<sub>3</sub>-MeOH 1:0  $\rightarrow$  15:1) to give aplaminal analog **10** (9.6 mg, 65%) as a yellow solid;  $[\alpha]_{\text{D}}^{23} +73.1$  (*c* 0.29, CHCl<sub>3</sub>); IR (CHCl<sub>3</sub>) 3358, 3021, 1752, 1719, 1681, 1604, 1510, 1437, 1282, 795, 760 cm<sup>-1</sup>; <sup>1</sup>H NMR (400 MHz, CDCl<sub>3</sub>)  $\delta$  8.04 (d, *J* = 8.9 Hz, 2H), 7.44 (d, *J* = 8.9 Hz, 2H), 4.15 (dd, *J* = 10.8, 3.7 Hz, 1H), 3.91 (s, 3H), 3.90 (s, 3H), 3.68 (m, 1H), 3.58 (m, 1H), 3.36–3.33 (m, 2H), 3.08 (d, *J* = 10.3 Hz, 1H), 2.37 (s, 3H); <sup>13</sup>C NMR (100 MHz, CDCl<sub>3</sub>)  $\delta$  167.3, 166.5, 165.4, 145.1, 130.6 (2C), 128.1, 124.6 (2C), 87.7, 61.2, 55.1, 53.3, 52.3, 46.2, 37.3; HRMS (ESI) *m/z* 356.1271, calcd for C<sub>16</sub>H<sub>18</sub>N<sub>3</sub>NaO<sub>5</sub> [M+Na]<sup>+</sup> 356.1245.

### General procedure for the aplaminal analogs 14, 16, and 17.

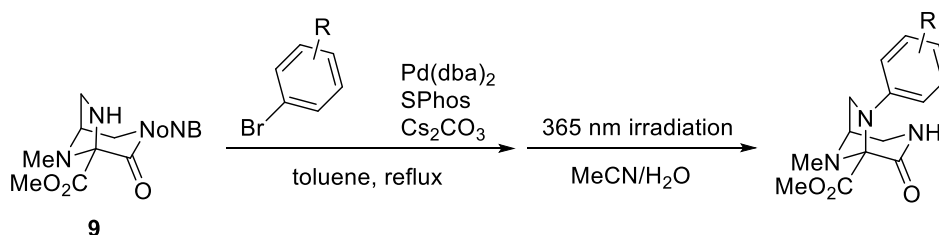

To the mixture of lactam **9** (ca. 20  $\mu\text{mol}$ ), bromide (3–5 eq), Pd(dba)<sub>2</sub> (1.0 eq), SPhos (2.0 eq), and Cs<sub>2</sub>CO<sub>3</sub> (5–10 eq) was added degassed toluene (2.0 mL). The mixture was stirred at reflux for 24 h, filtered through a pad of Celite<sup>®</sup>, and concentrated. The residual oil was purified by column chromatography on silica gel (5 g, CHCl<sub>3</sub>-MeOH) to give coupling compound.

The solution of crude coupling compound in MeCN/H<sub>2</sub>O (6/1) (2.0 mL) was stirred at room temperature for 24 h under 365 irradiation and concentrated. The residual oil was purified by column chromatography on silica gel (CHCl<sub>3</sub>-MeOH) and by HPLC (Develosil ODS-HG-5, 45% MeOH) to give aplaminal analog.

### *m*-carbomethoxy analog 14.

<sup>1</sup>H NMR (400 MHz, acetone-*d*<sub>6</sub>)  $\delta$  7.48 (s, 1H), 7.35 (d, *J* = 7.8 Hz, 1H), 7.20 (dd, *J* = 8.2, 7.8 Hz, 1H), 7.11 (d, *J* = 8.2 Hz, 1H), 6.57 (brs, 1H), 4.29 (m, 1H), 3.84 (s, 3H), 3.80 (s, 3H), 3.77 (m, 1H), 3.65 (dd, *J* = 11.4, 4.2 Hz, 1H), 3.30 (d, *J* = 8.6 Hz, 1H), 3.22 (m, 1H), 2.47 (s, 3H); HRMS (ESI) *m/z* 356.1222, calcd for C<sub>16</sub>H<sub>19</sub>N<sub>3</sub>NaO<sub>5</sub> [M+Na]<sup>+</sup> 356.1222.

***p*-Chloro analog 16.**

<sup>1</sup>H NMR (400 MHz, acetone-*d*<sub>6</sub>) δ 7.09 (dd, *J* = 9.7, 2.2 Hz, 2H), 6.83 (dd, *J* = 9.7, 2.2 Hz, 2H), 6.58 (brs, 1H), 4.23 (ddd, *J* = 8.6, 3.7, 1.4 Hz, 1H), 3.79 (s, 3H), 3.74 (m, 1H), 3.64 (m, 1H), 3.24 (d, *J* = 8.6 Hz, 1H), 3.21 (m, 1H), 2.45 (s, 3H); HRMS (ESI) *m/z* 332.0778, calcd for C<sub>14</sub>H<sub>16</sub>ClN<sub>3</sub>NaO<sub>3</sub> [M+Na]<sup>+</sup> 332.0743.

***p*-Nitrile analog 17.**

<sup>1</sup>H NMR (400 MHz, acetone-*d*<sub>6</sub>) δ 7.46 (d, *J* = 8.8 Hz, 2H), 6.92 (d, *J* = 8.8, 2H), 6.67 (brs, 1H), 4.28 (m, 1H), 3.81 (s, 3H), 3.70–3.67 (m, 2H), 3.38 (d, *J* = 9.2 Hz, 1H), 3.26 (d, *J* = 10.2 Hz, 1H), 2.46 (s, 3H); HRMS (ESI) *m/z* 323.1120, calcd for C<sub>15</sub>H<sub>16</sub>N<sub>4</sub>NaO<sub>3</sub> [M+Na]<sup>+</sup> 323.1154.

**Cytotoxic activity**

Stock cultures of HeLa S3 cells were maintained in Dulbecco's Modified Eagle Medium containing 10% fetal bovine serum, 100 µg/mL of penicillin, and 100 µg/mL streptomycin at 37 °C under 5% CO<sub>2</sub>. For the purpose of the experiment, 5×10<sup>3</sup> cells suspended in 100 µL of medium per well were plated in 96-well plate, and incubated at 37 °C under 5% CO<sub>2</sub>. After incubation for 24 h, a solution of compound in DMSO (1 µL, concentration: 0.001, 0.01, 0.1, 1, 10 mM, respectively) was added to the above-mentioned well, resulting in various concentrations of the compound (0.01, 0.1, 1, 10, 100 µM) or solvent control (1% DMSO). After incubation for 96 h under the same conditions, 5 µL of WST-8 reagent solution was added to the cell culture, and the cell culture was further incubated for 2 h. Colorimetric determination of WST-8 was conducted at 450 nm with an optical reference wavelength at 595 nm using a microplate reader. The absorbance obtained upon the addition of the vehicle was considered as 100%. Data are expressed from the dose-response curve at three independent experiments. The cytotoxic effects of each compound were obtained as IC<sub>50</sub> values calculated by probit analysis using the PriProbit 1.63 software.

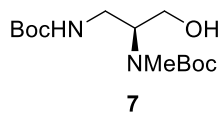

<sup>1</sup>H NMR (400 MHz, CDCl<sub>3</sub>)

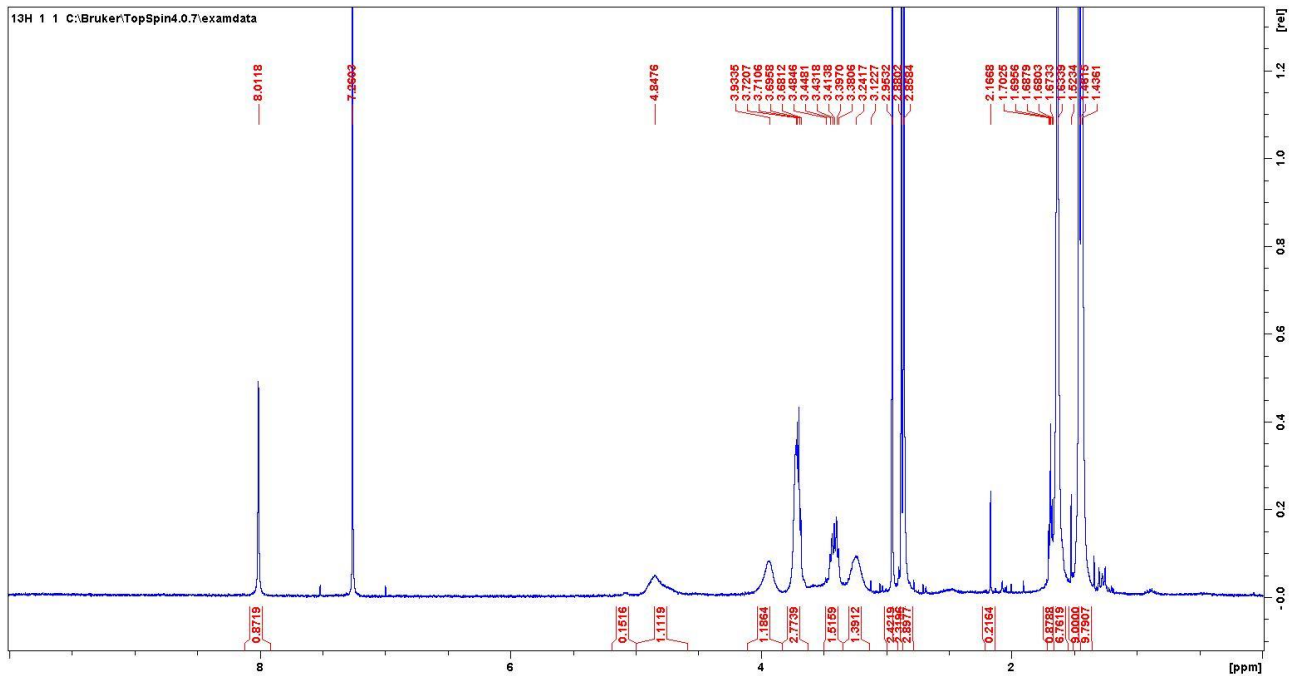

<sup>13</sup>C NMR (100 MHz, CDCl<sub>3</sub>)

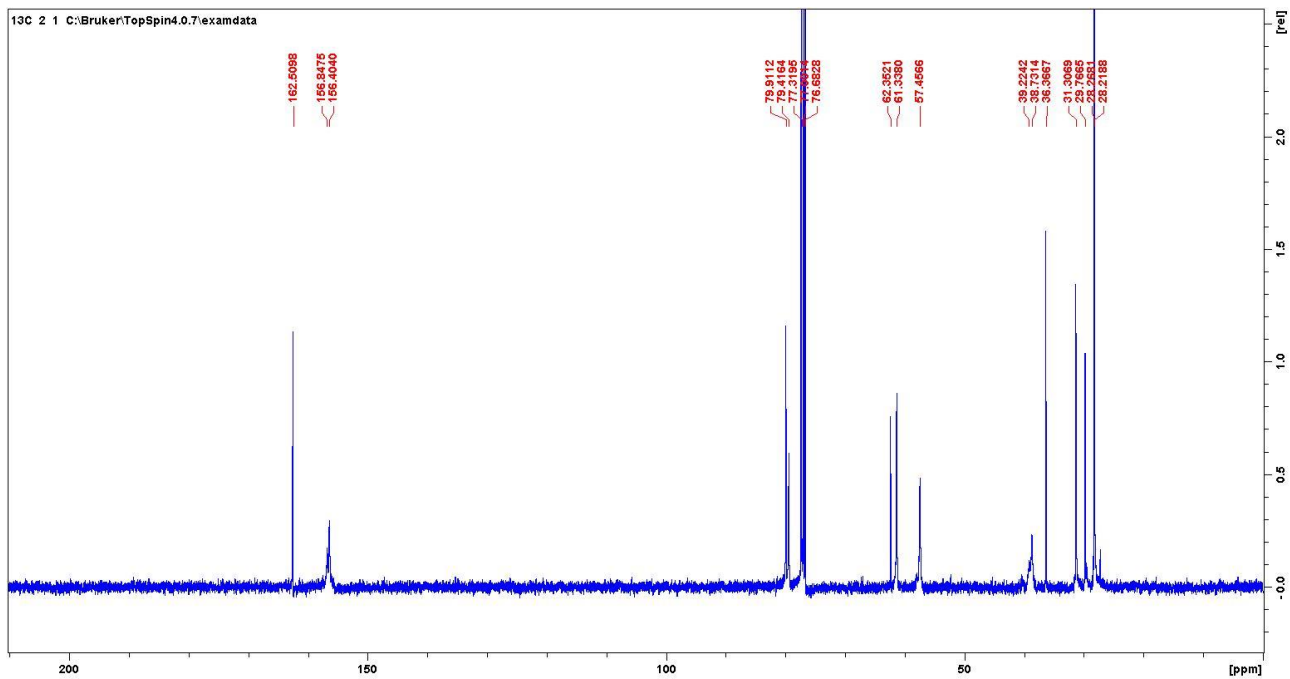





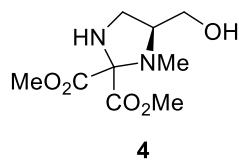

<sup>1</sup>H NMR (400 MHz, CDCl<sub>3</sub>)

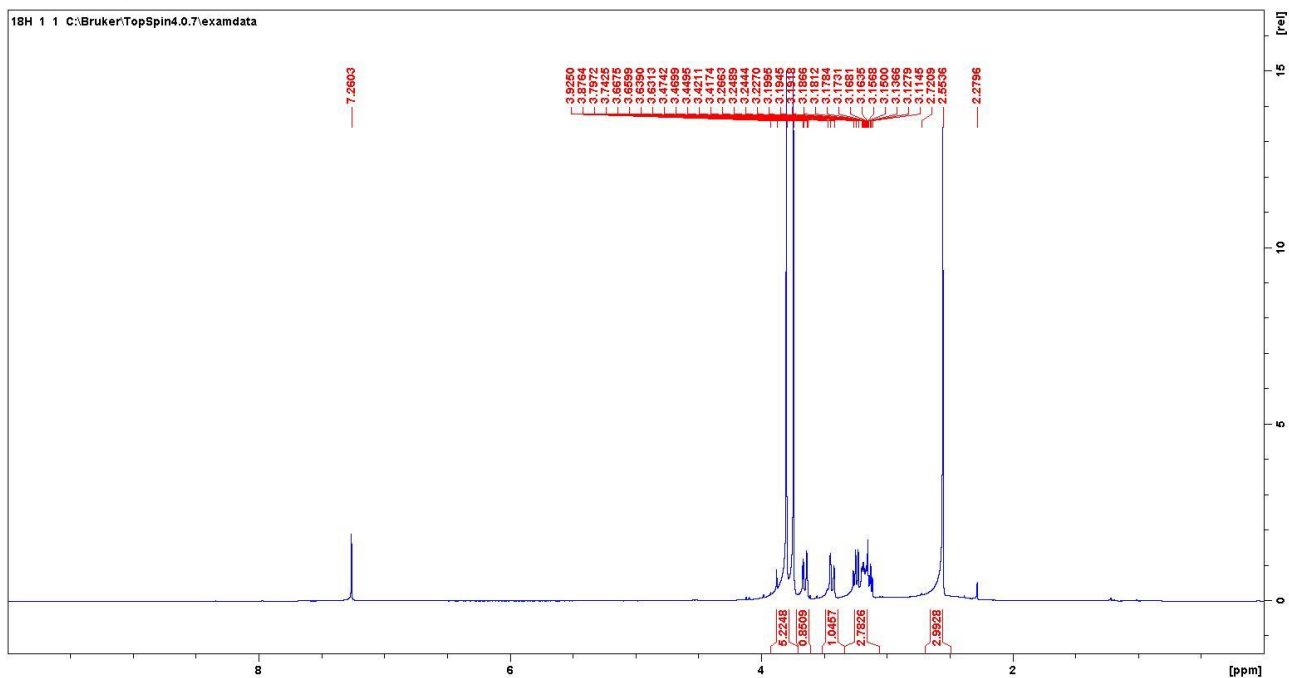

<sup>13</sup>C NMR (100 MHz, CDCl<sub>3</sub>)

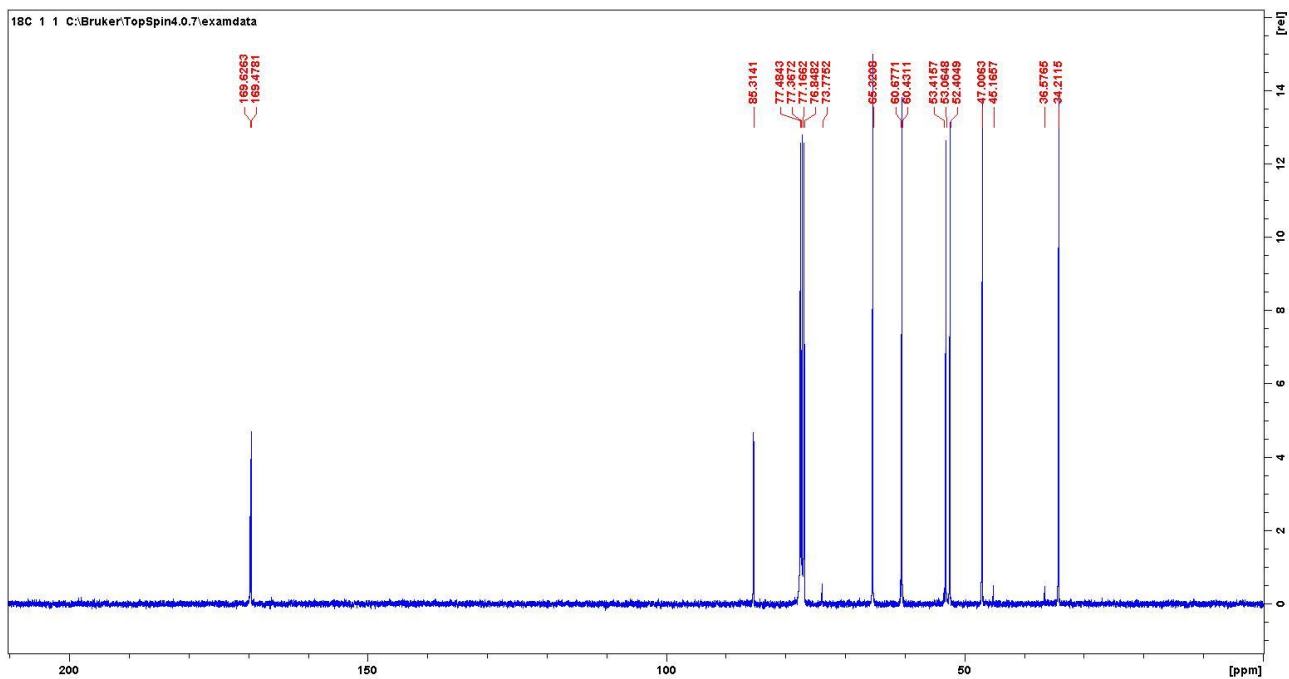

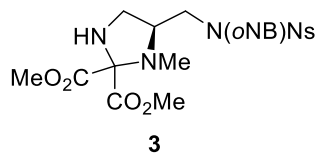

<sup>1</sup>H NMR (400 MHz, CDCl<sub>3</sub>)

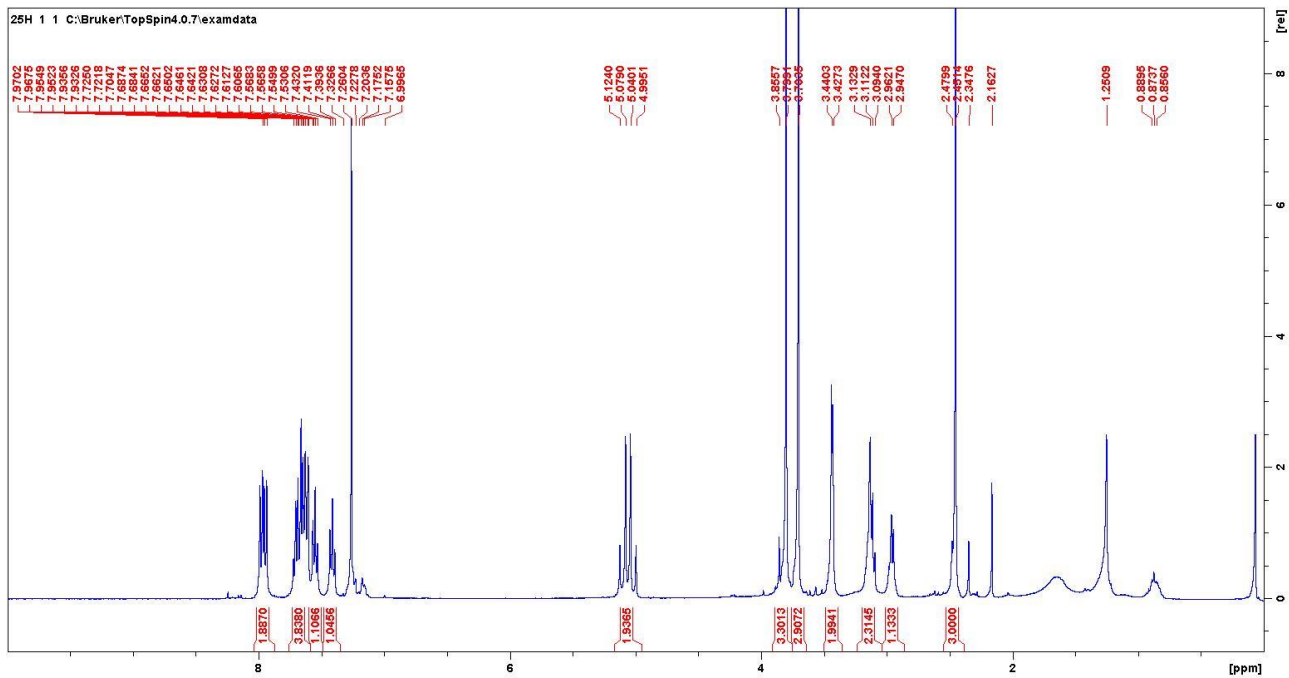

<sup>13</sup>C NMR (100 MHz, CDCl<sub>3</sub>)

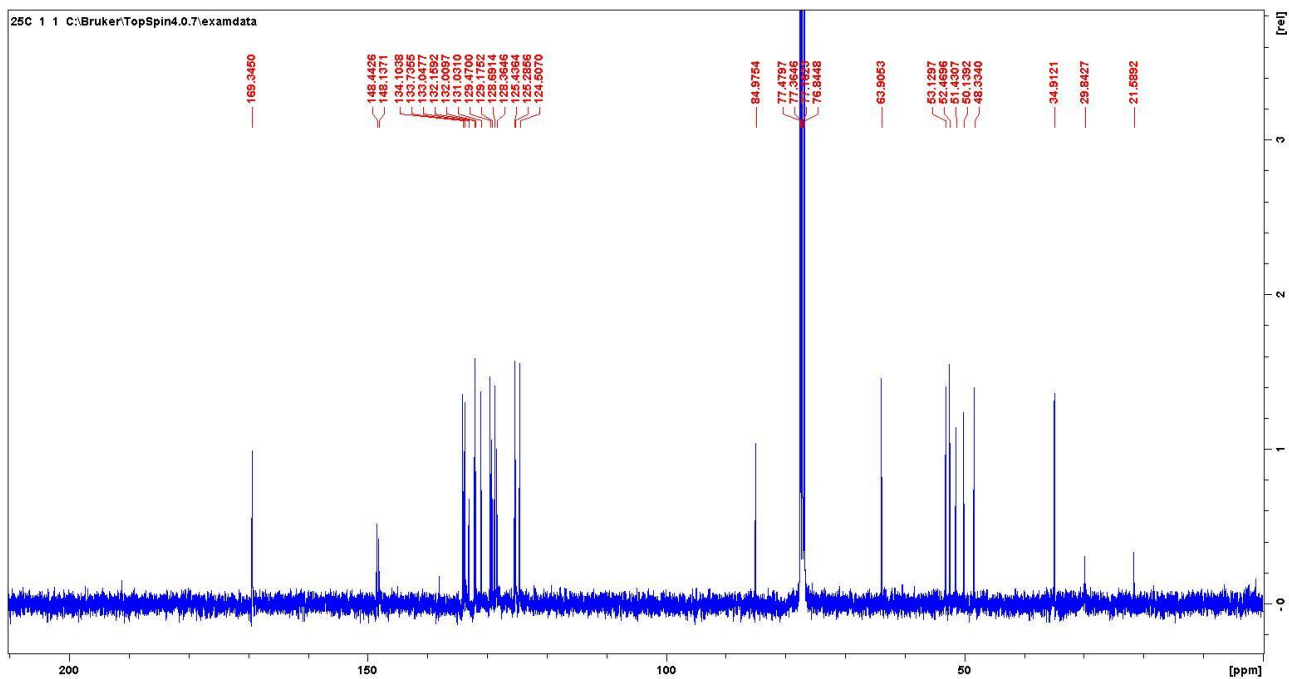

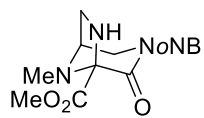

9

<sup>1</sup>H NMR (400 MHz, CDCl<sub>3</sub>)

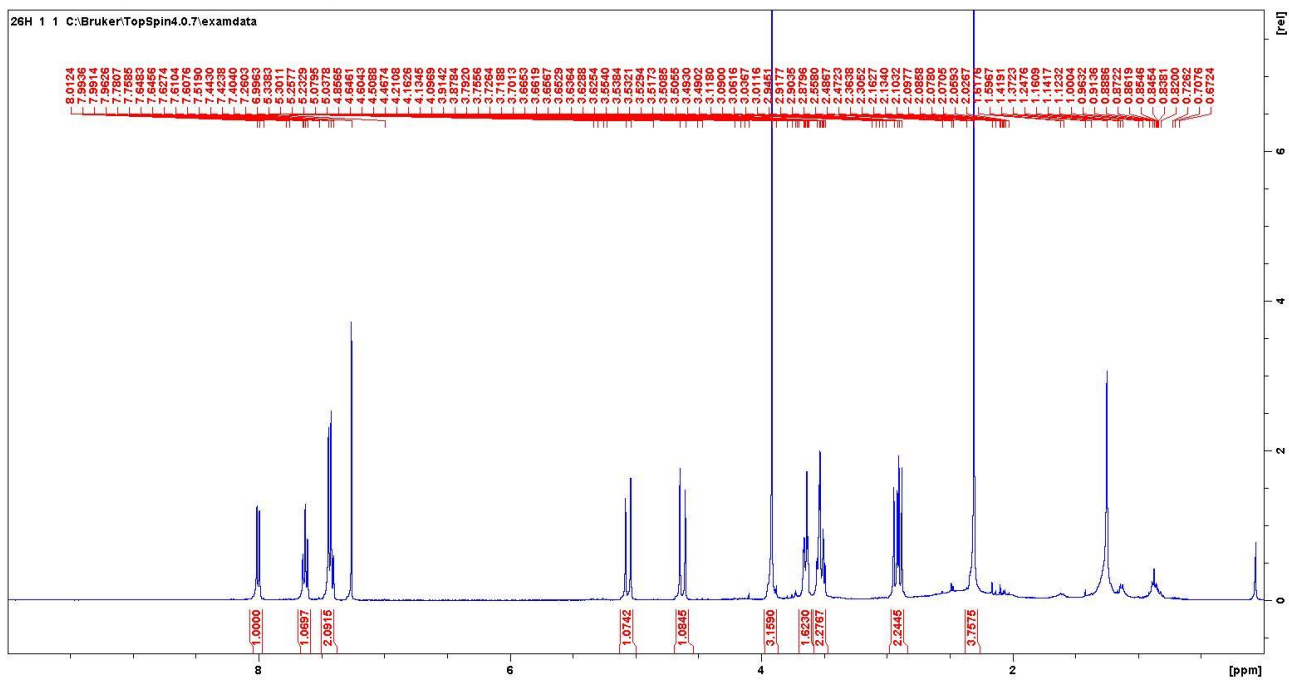

<sup>13</sup>C NMR (100 MHz, CDCl<sub>3</sub>)

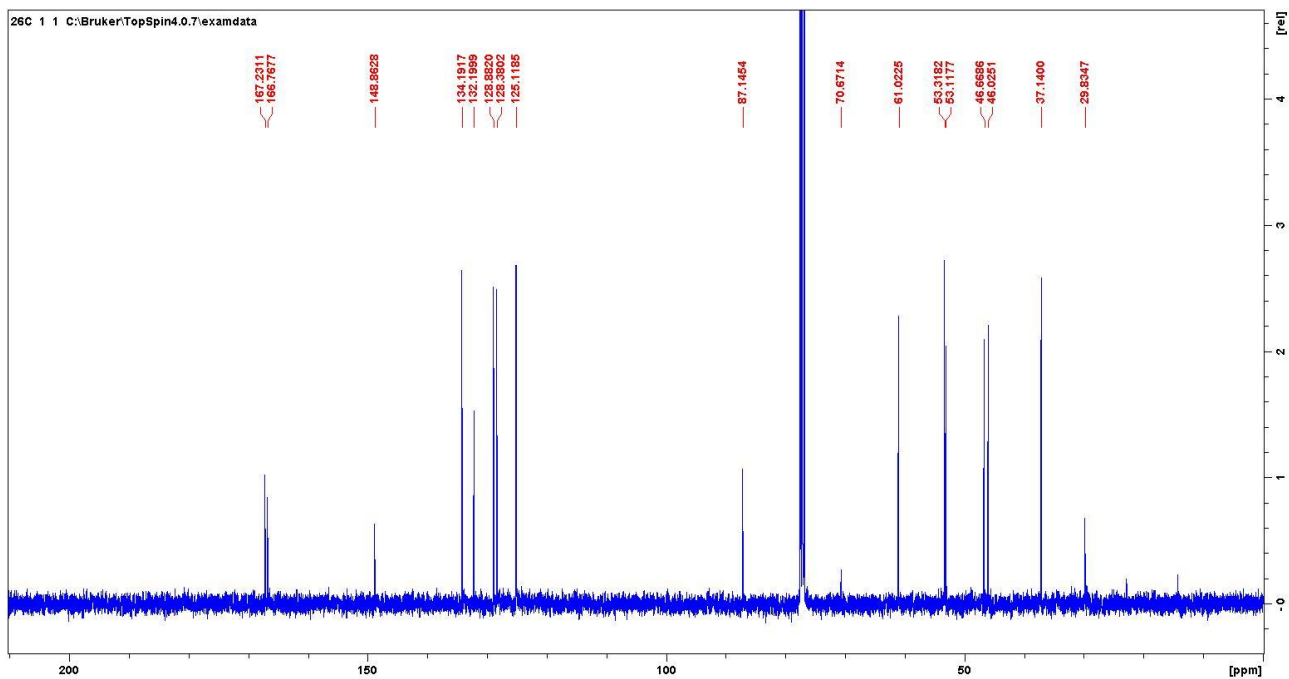



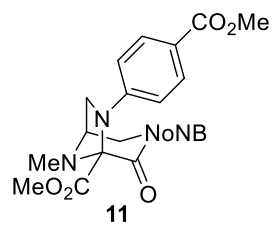

<sup>1</sup>H NMR (400 MHz, CDCl<sub>3</sub>)

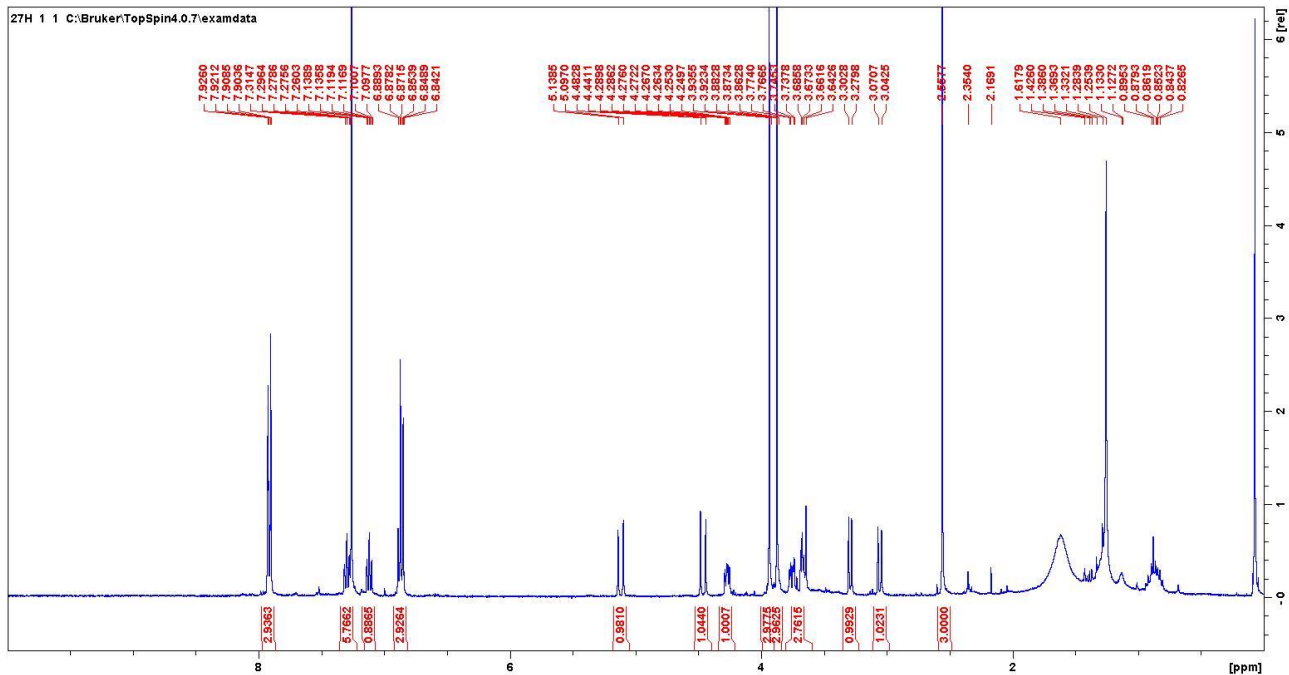

<sup>13</sup>C NMR (100 MHz, CDCl<sub>3</sub>)

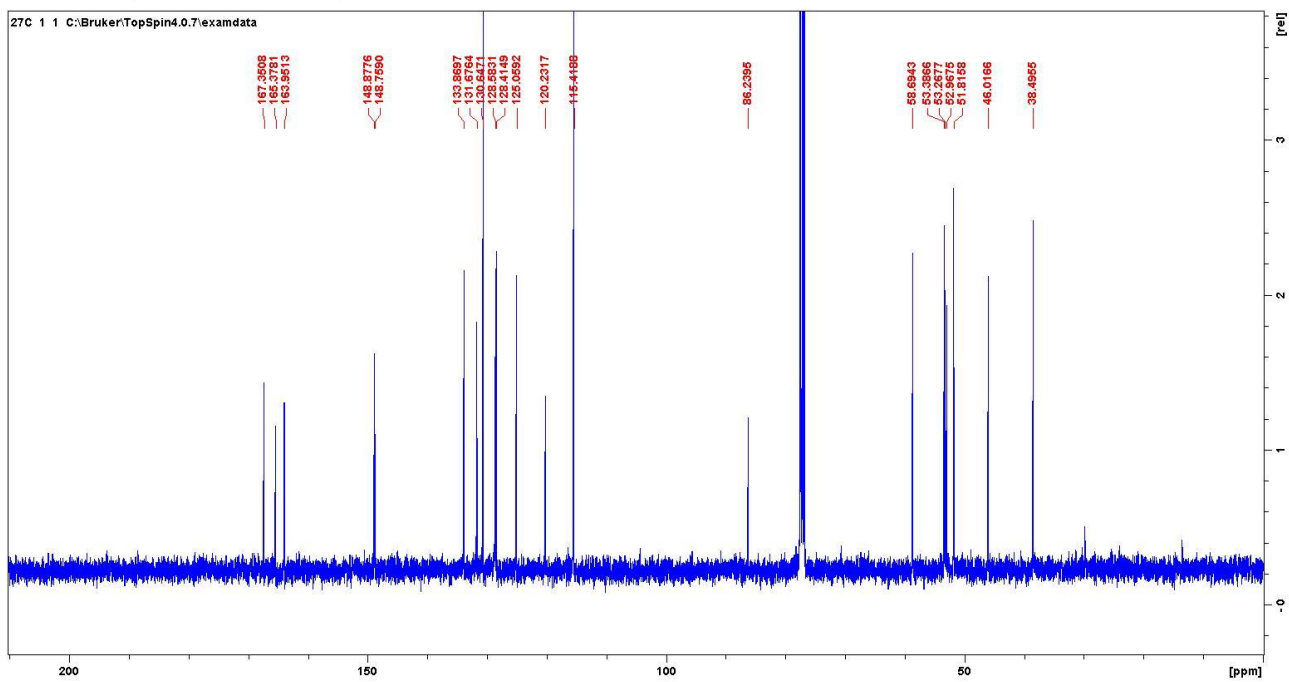

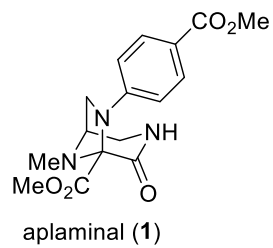

<sup>1</sup>H NMR (600 MHz, acetone-*d*<sub>6</sub>)

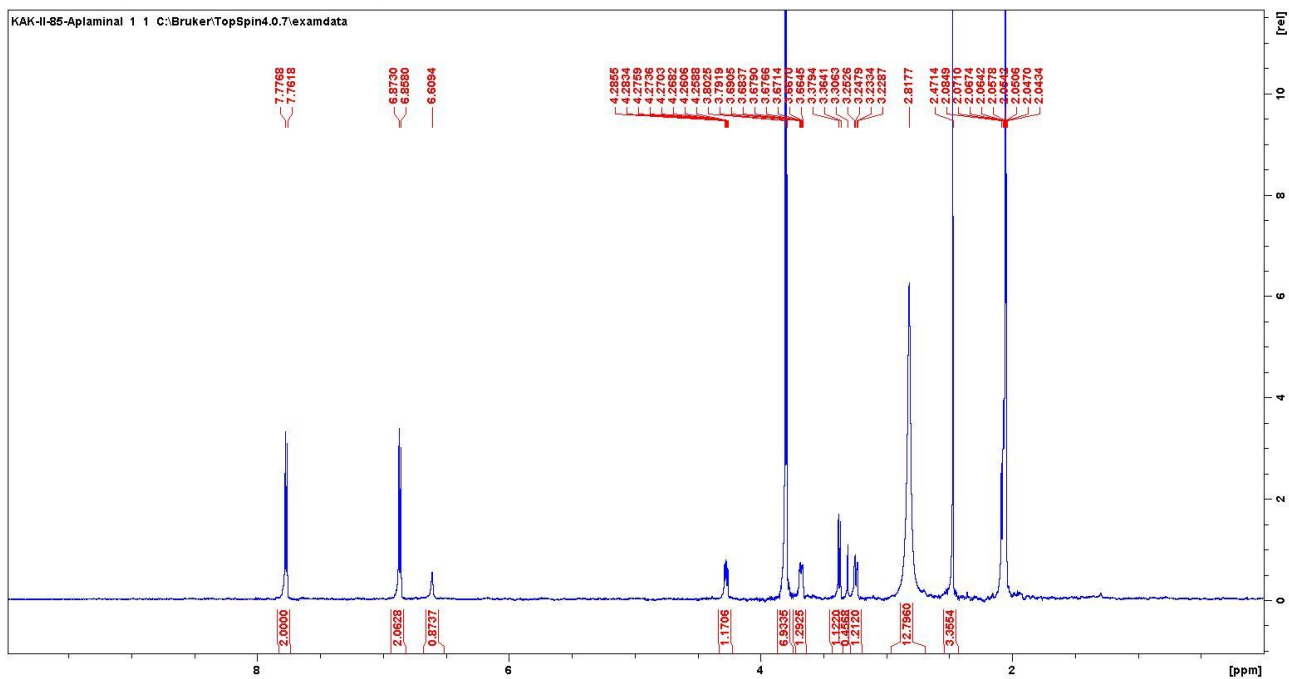

<sup>13</sup>C NMR (151 MHz, acetone-*d*<sub>6</sub>)

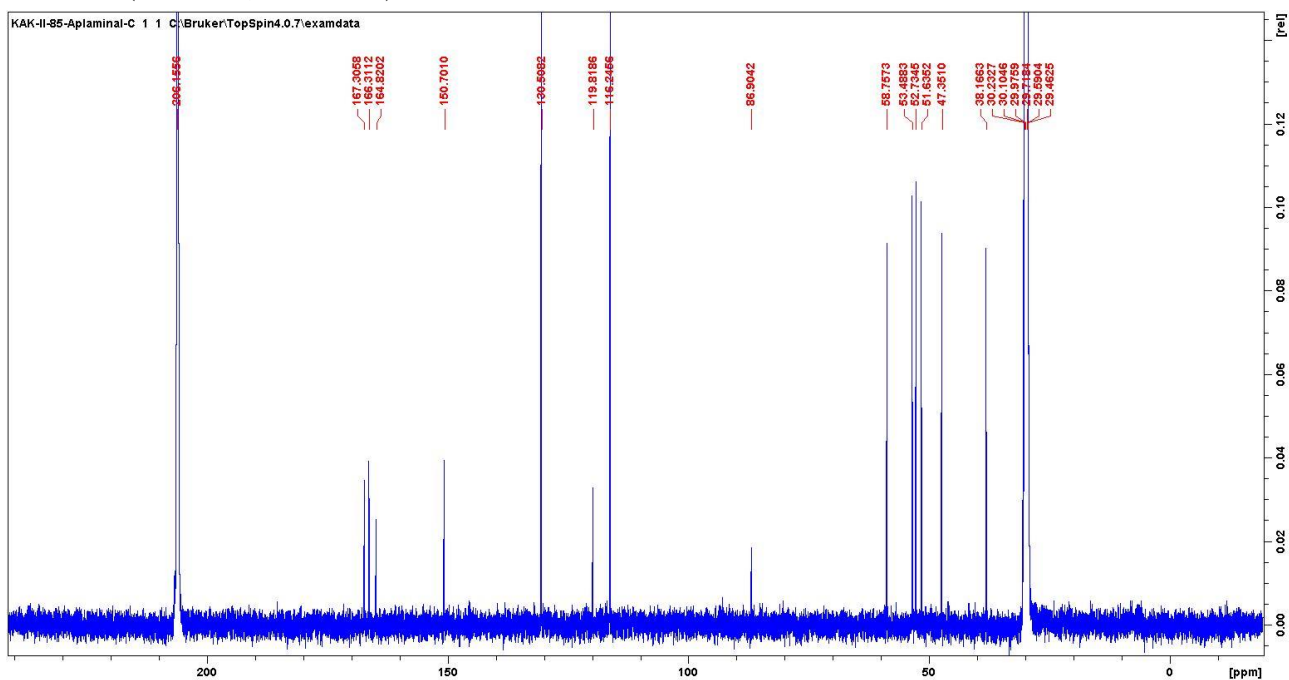

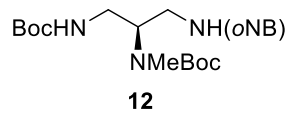

<sup>1</sup>H NMR (400 MHz, DMSO-*d*<sub>6</sub>)

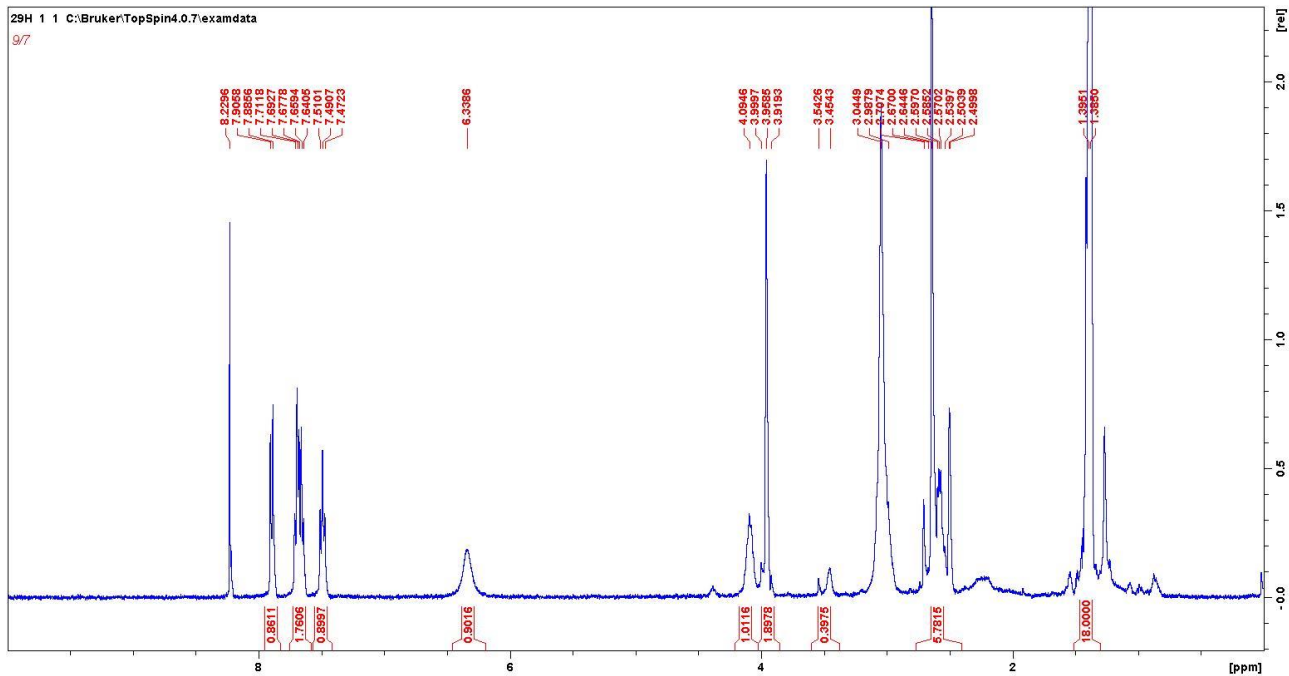

<sup>13</sup>C NMR (100 MHz, DMSO-*d*<sub>6</sub>)

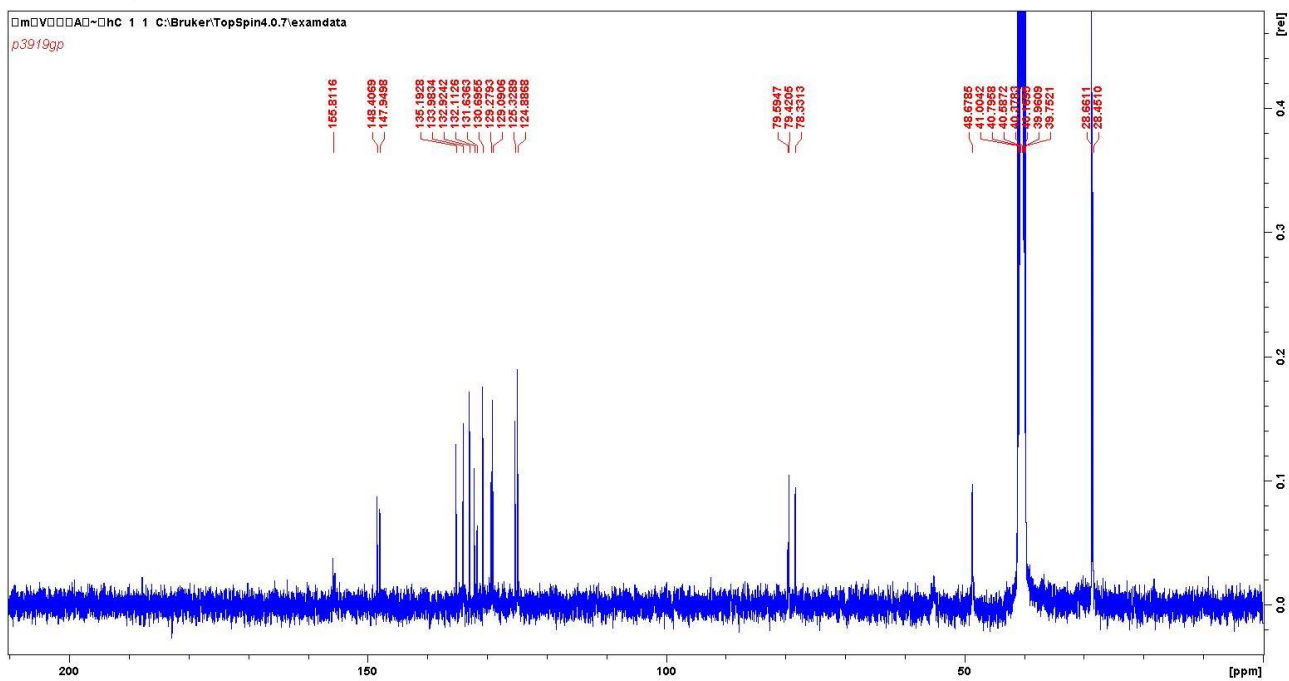

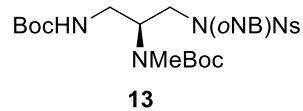

<sup>1</sup>H NMR (400 MHz, DMSO-*d*<sub>6</sub>)

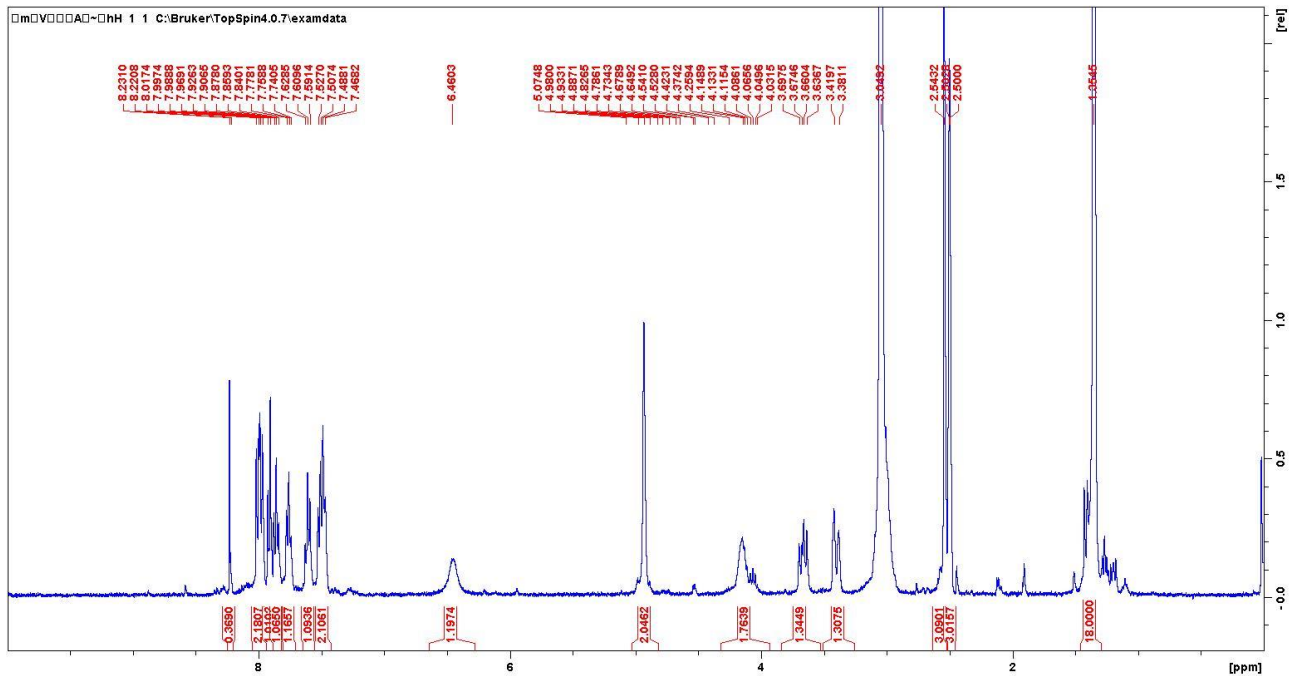

<sup>13</sup>C NMR (100 MHz, DMSO-*d*<sub>6</sub>)

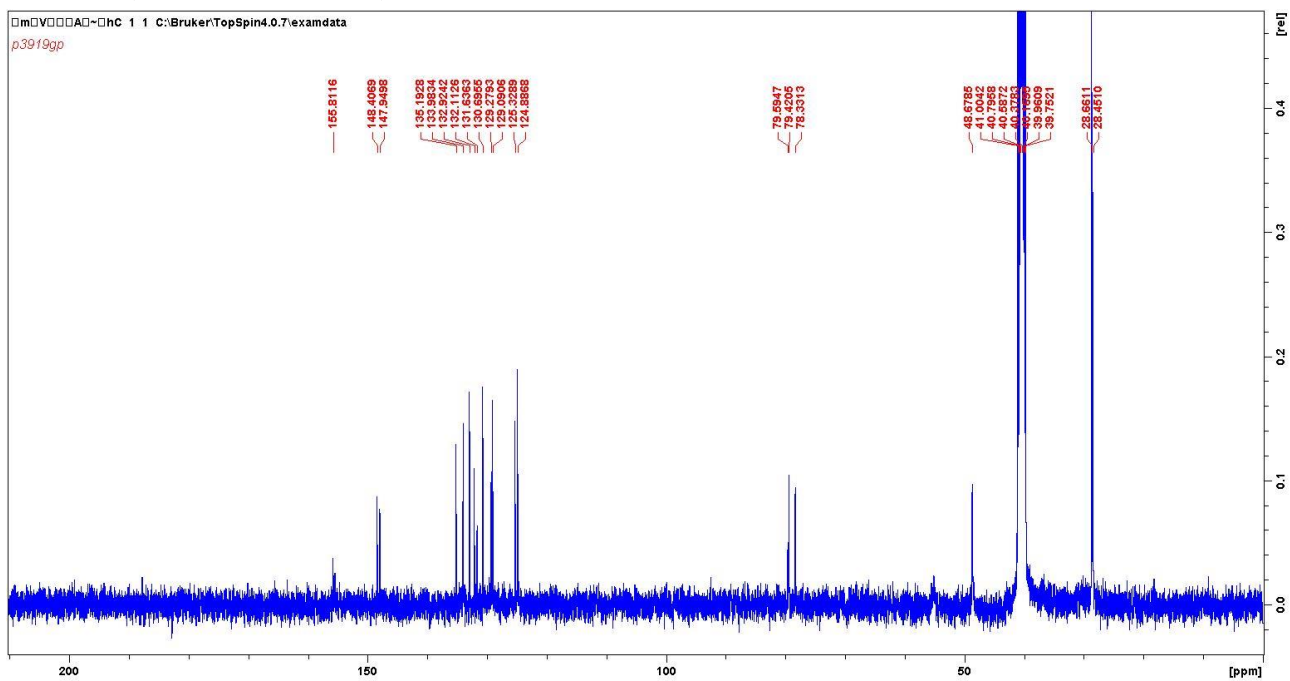



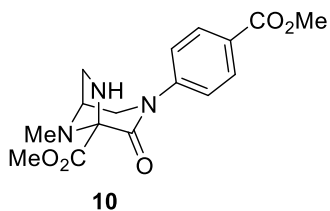

<sup>1</sup>H NMR (400 MHz, CDCl<sub>3</sub>)

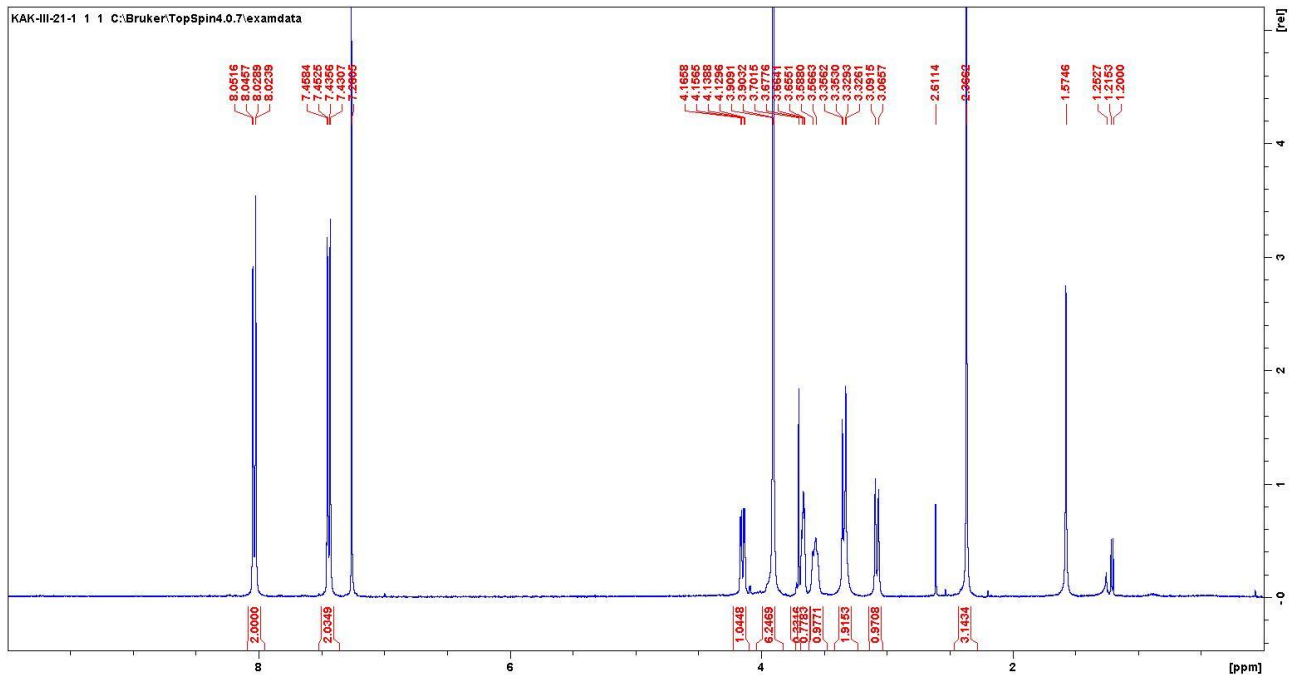

<sup>13</sup>C NMR (100 MHz, CDCl<sub>3</sub>)

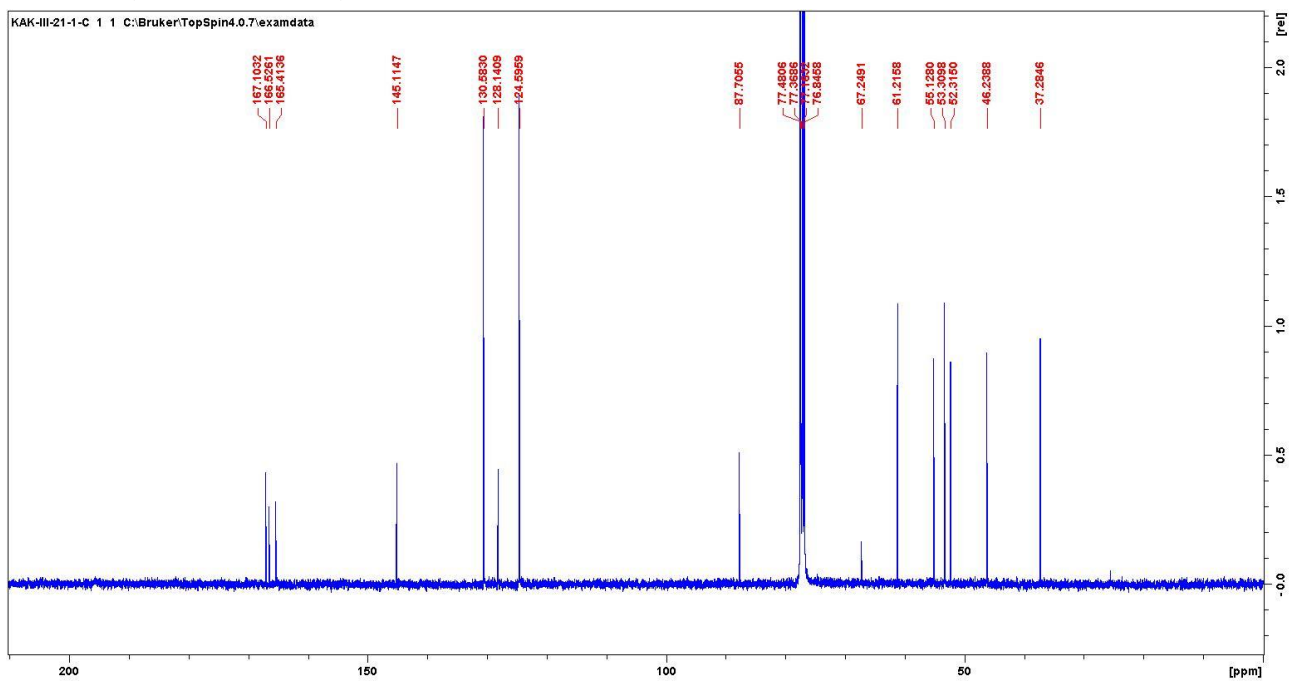

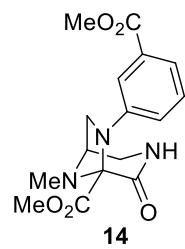

<sup>1</sup>H NMR (400 MHz, acetone-*d*<sub>6</sub>)

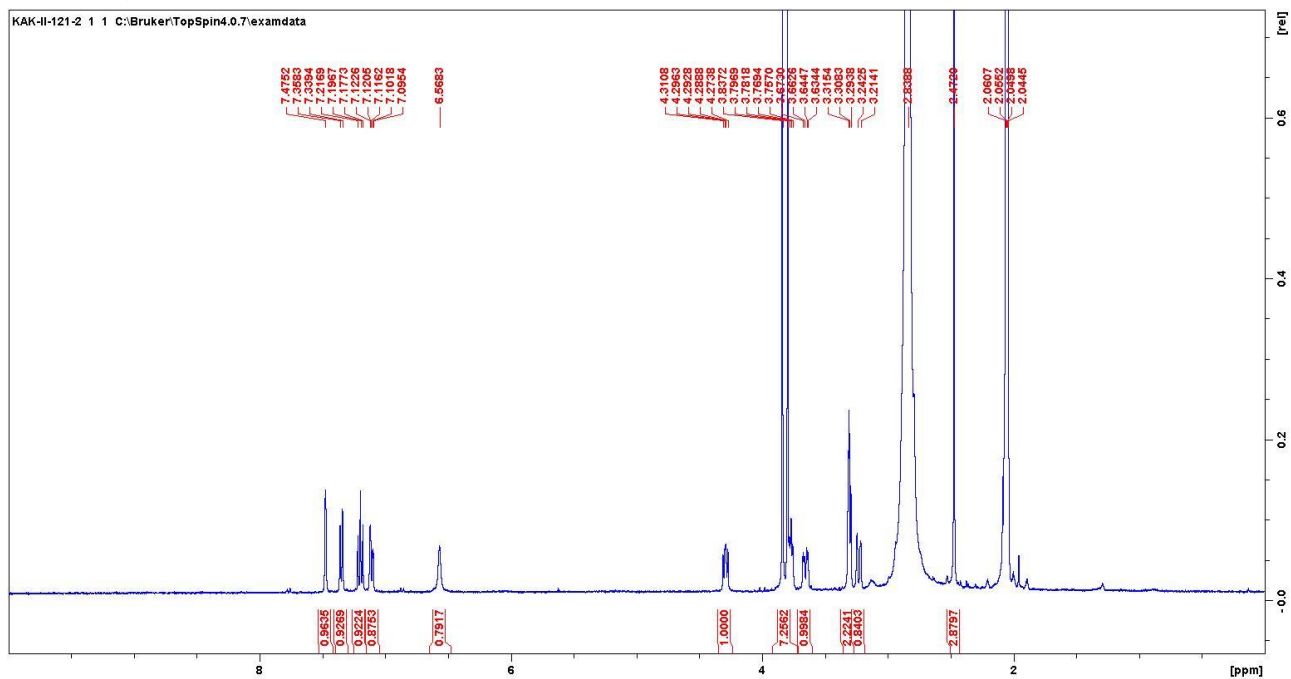

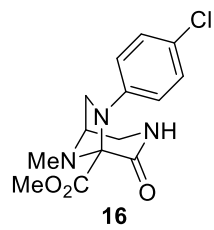

<sup>1</sup>H NMR (400 MHz, acetone-*d*<sub>6</sub>)

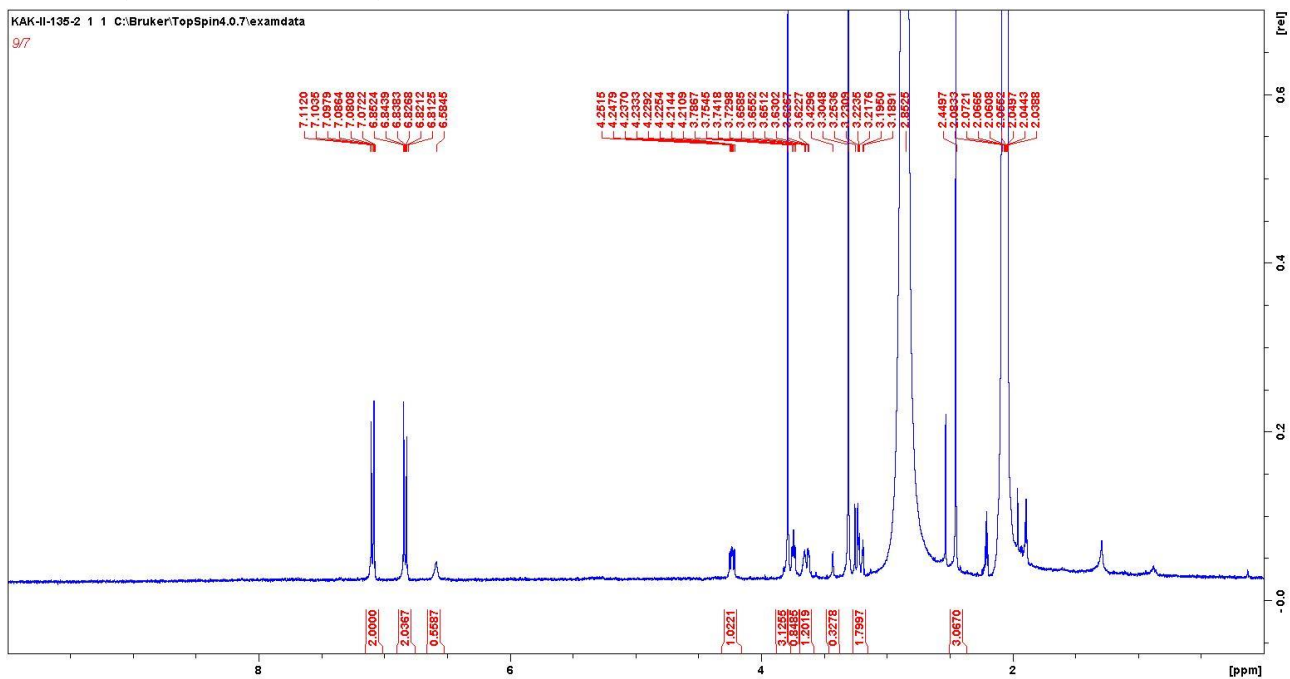



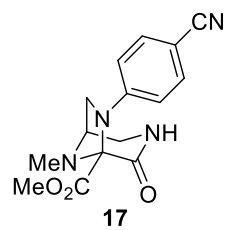

<sup>1</sup>H NMR (400 MHz, acetone-*d*<sub>6</sub>)

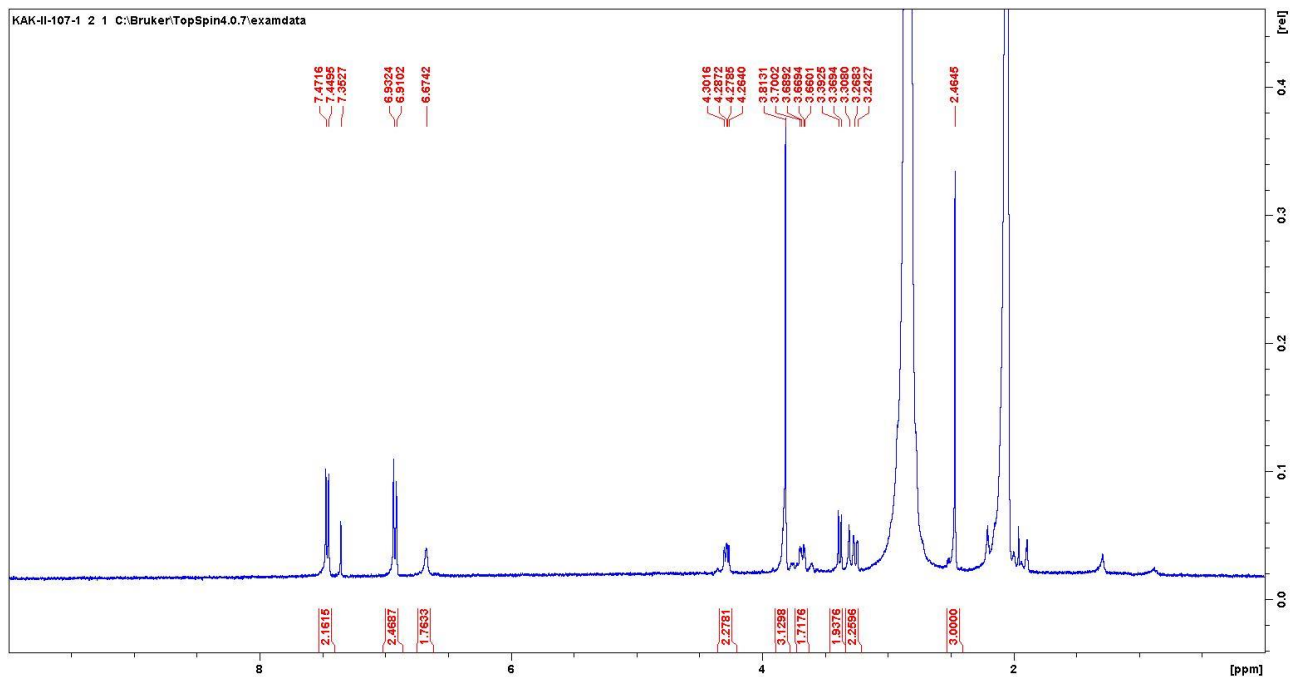

Supplement: c9nj04743c1.pdf [file c9nj04743c1.pdf]
